# Supplementary material
Source: PubMed Central journal article supplement (PMC7161829)
Supplement: BIP-104-753-s001.pdf [file BIP-104-753-s001.pdf]

## **AVP-IC<sub>50</sub>Pred: Multiple machine learning techniques based prediction of peptide antiviral activity in terms of half maximal inhibitory concentration (IC<sub>50</sub>)**

Abid Qureshi<sup>1</sup>, Himani Tandon<sup>1</sup> and Manoj Kumar<sup>1,\*</sup>

<sup>1</sup>Bioinformatics Centre, Institute of Microbial Technology, Council of Scientific and Industrial Research, Sector 39-A, Chandigarh-160036, India

\* To whom correspondence should be addressed: [manojk@imtech.res.in](mailto:manojk@imtech.res.in)

### **Supporting Data**

**Figure S1.** Two sample logos of eight N and C- terminal residues of 97 highly effective peptides (IC<sub>50</sub> < 1 μM) and an equal number of least effective peptides (IC<sub>50</sub> > 100 μM). Amino acids are colored as per their (i) Charge, (ii) Hydrophobicity, (iii) Surface exposure, (iv) Flexibility and (v) Disorder

**Figure S2.** Box plots of 15 best performing physicochemical properties using SVM (see Table S3a) of 97 highly effective peptides (IC<sub>50</sub> < 1 μM) and an equal number of least effective peptides (IC<sub>50</sub> > 100 μM)

**Figure S3.** AVP-IC<sub>50</sub>Pred workflow for model development

**Figure S4.** AVP-IC<sub>50</sub>Pred submit form

**Table S1.** Training/testing dataset used in the development of AVP-IC<sub>50</sub>Pred prediction models.

**Table S2.** Validation dataset used in the development of AVP-IC<sub>50</sub>Pred prediction models.

**Table S3.** 15 best performing physicochemical properties (a-d)

**Table S4.** SVM and RF parameters used to develop prediction models.

**Table S5.** Performance of SVM models based on training and validation data composed on randomized instances.

(i) **Charge:** Positively charged residues (K, R, H) are colored blue, and negatively charged residues (D, E) are colored red; all neutral residues are colored black.

a) N-terminal

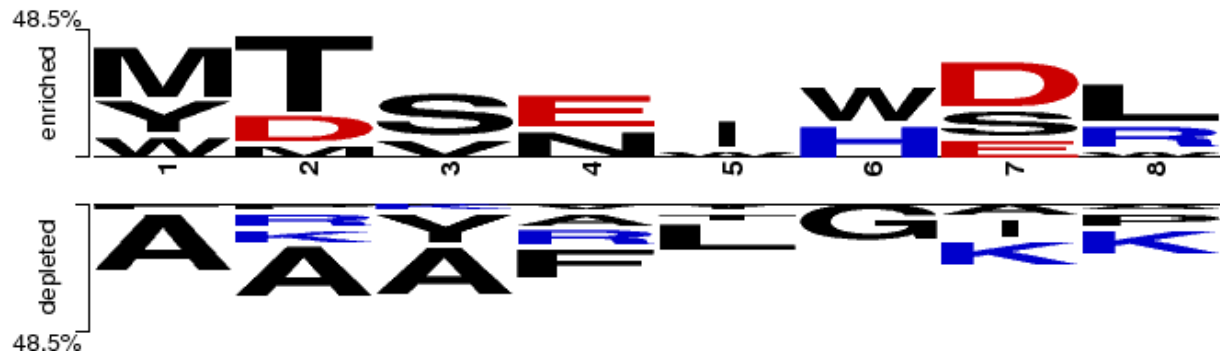

b) C-terminal

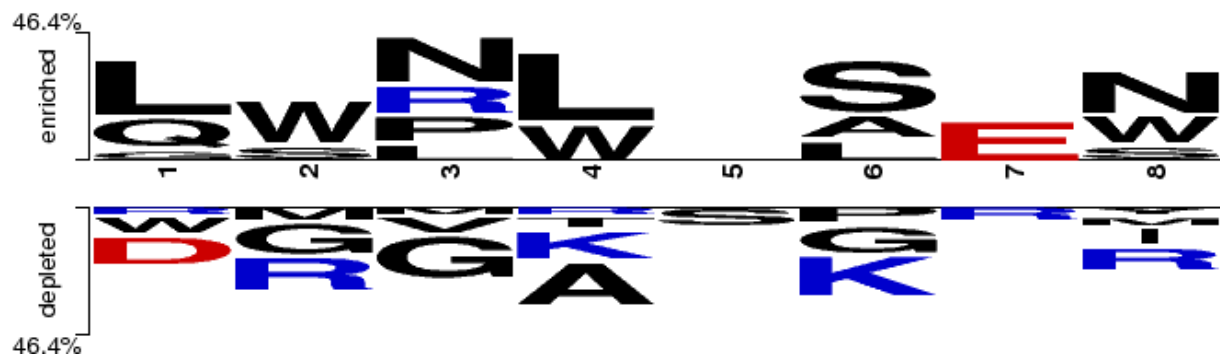

(ii) **Hydrophobicity:** Hydrophobic residues (A, F, G, I, L, P, V, W, Y) are cyan colored, while the remaining hydrophilic residues are colored black. This classification was based on (Eisenberg, 1984).

a) N-terminal

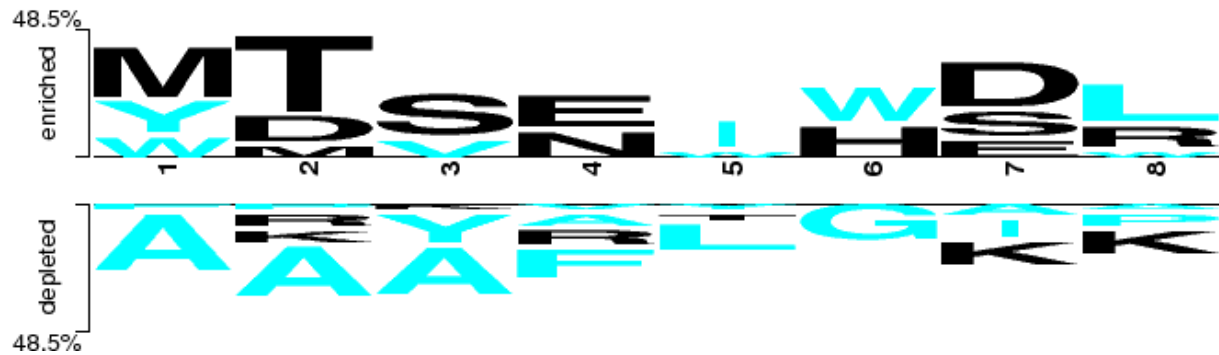

b) C-terminal

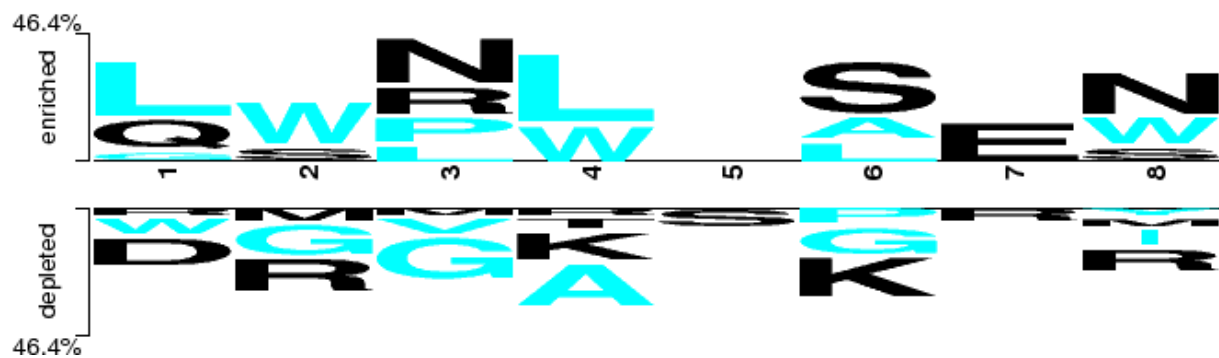

(iii) **Surface exposure:** Surface exposed residues (D, E, H, K, N, P, Q, R, S, T, Y) are colored orange, and buried residues (A, C, F, G, I, L, M, V, W) are colored black. This classification was based on (Janin, 1979).

a) N-terminal

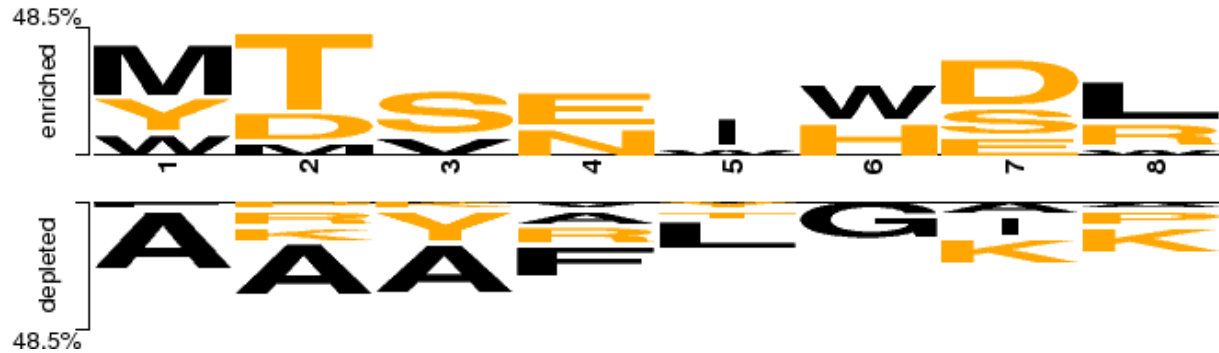

b) C-terminal

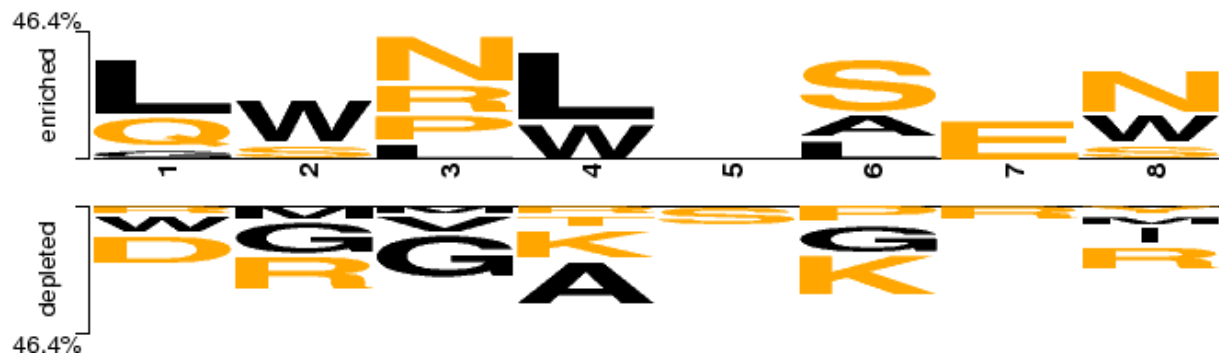

(iv) **Flexibility:** High flexibility residues (D, E, K, N, P, Q, R, S) are colored red, whereas low flexibility residues (A, C, F, G, H, I, L, M, T, V, W, Y) are colored green. This classification was based on (Vihinen et al., 1994).

a) N-terminal

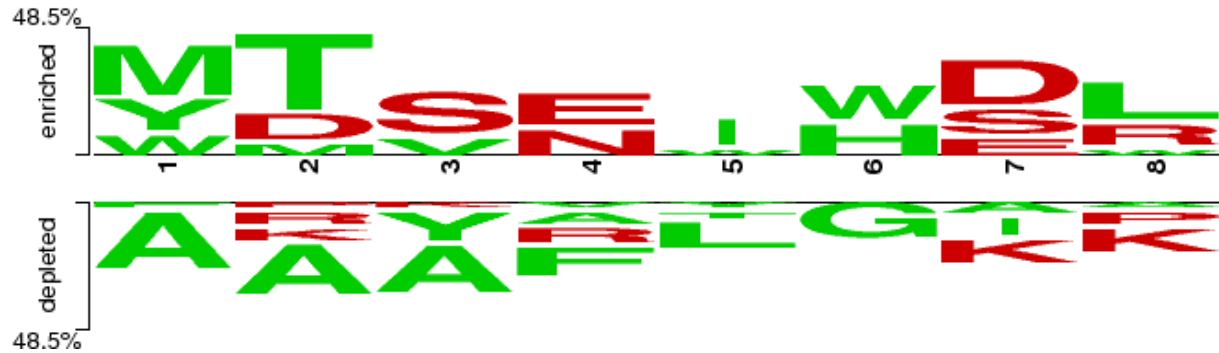

b) C-terminal

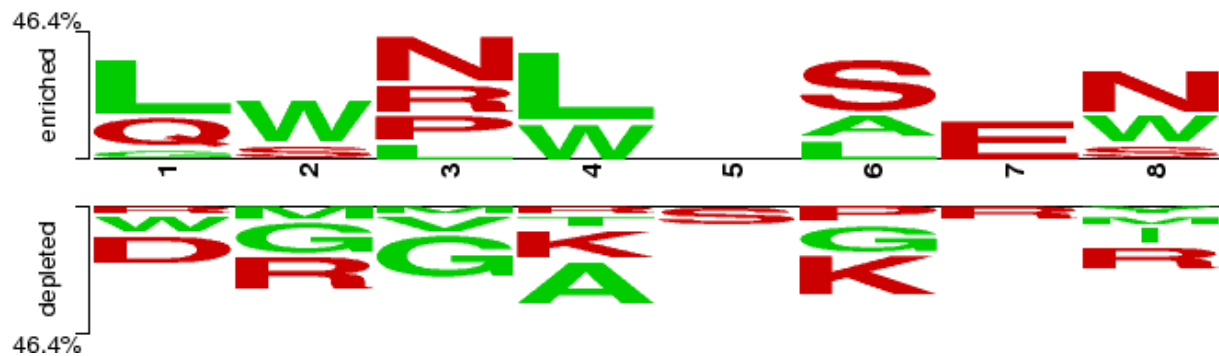

(v) **Disorder:** Disorder-promoting residues (A, R, S, Q, E, G, K, P) are colored red, order-promoting residues (N, C, I, L, F, W, Y, V) are colored blue, and disorder-order neutral residues (D, H, M, T) are colored black. This classification was based on (Dunker et al., 2001).

a) N-terminal

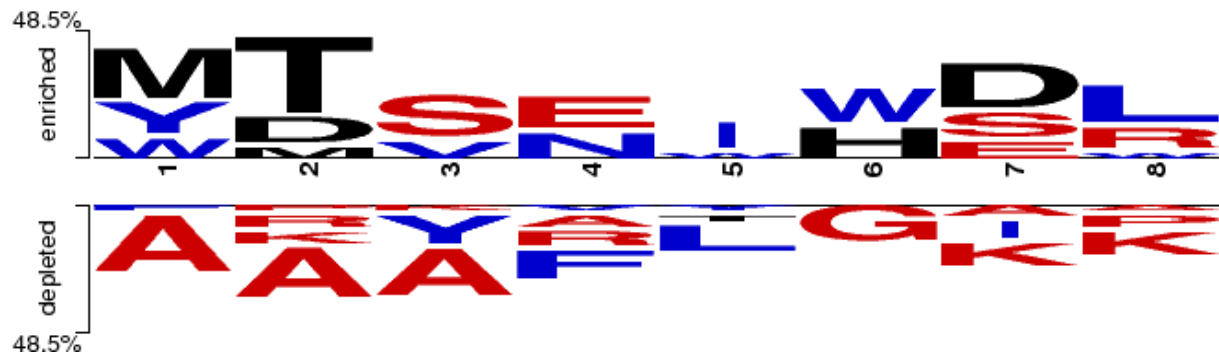

b) C-terminal

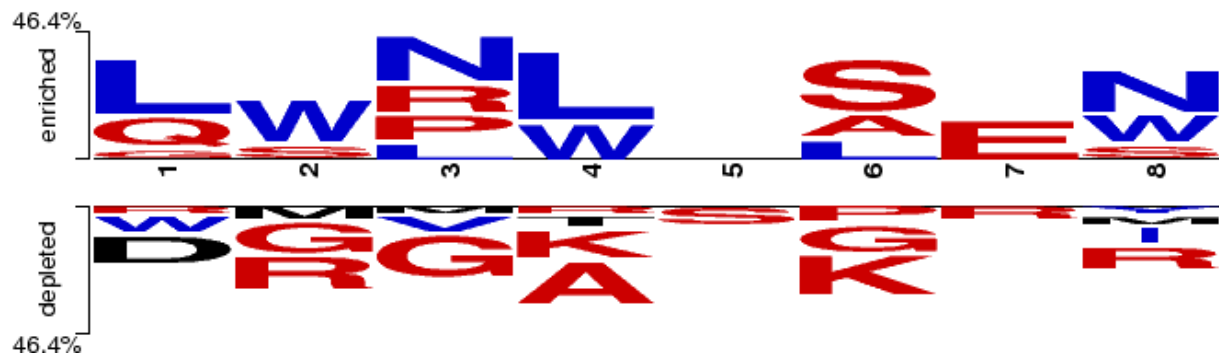

**Figure S1.** Two sample logos of eight N and C- terminal residues of 97 highly effective peptides ( $IC_{50} < 1\mu M$ ) and an equal number of least effective peptides ( $IC_{50} > 100\mu M$ ). Amino acids are colored as per their (i) Charge, (ii) Hydrophobicity, (iii) Surface exposure, (iv) Flexibility and (v) Disorder

(i) (A) QIAN880113, (B) SUYM030101, (C) FINA910102, (D) CHOP780211, (E) MUNV940105, (F) TANS770102

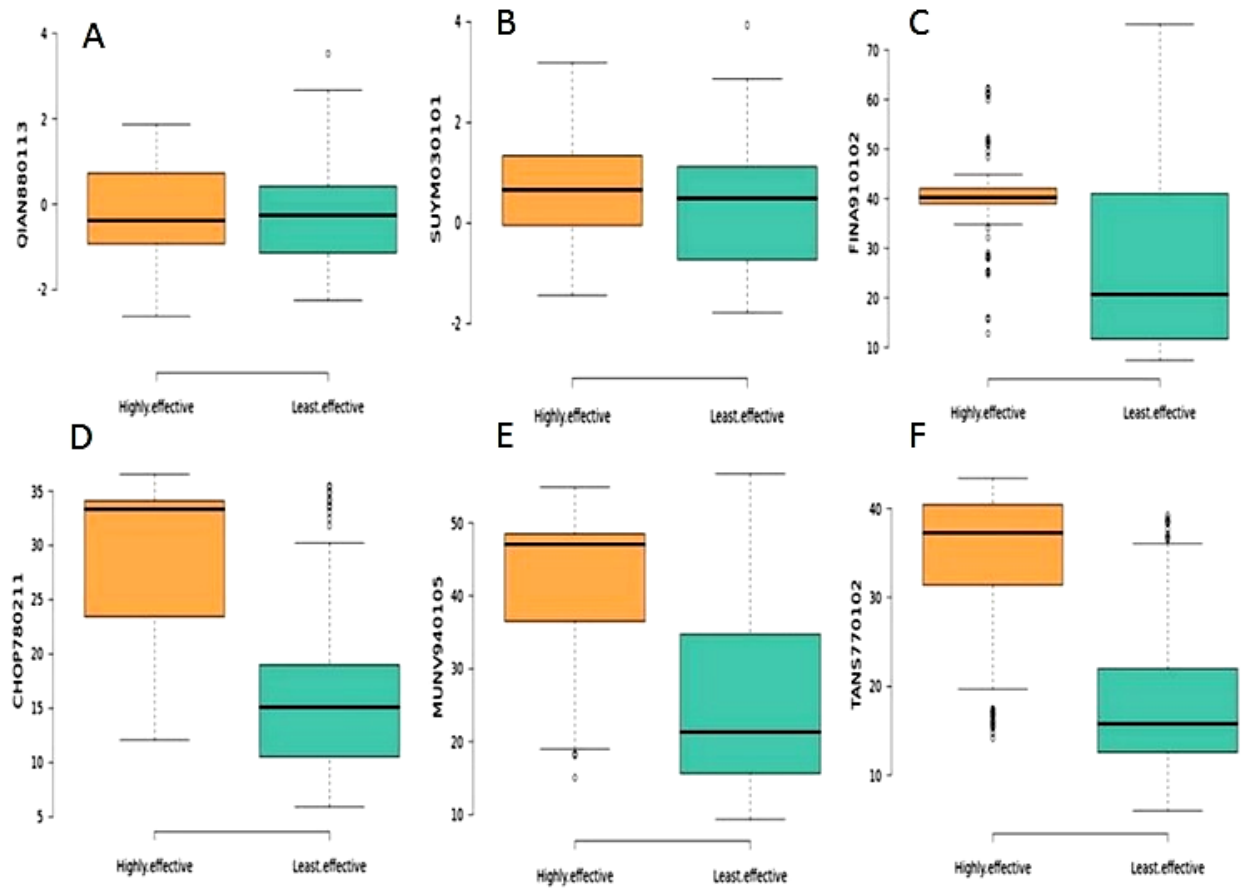



(ii) (G) MUNV940104, (H) PALJ810114, (I) PALJ810115, (J) QIAN880110, (K) AURR980103, (L) ISOY800104, (M) MUNV940102, (N) RACS820110, (O) AURR980105

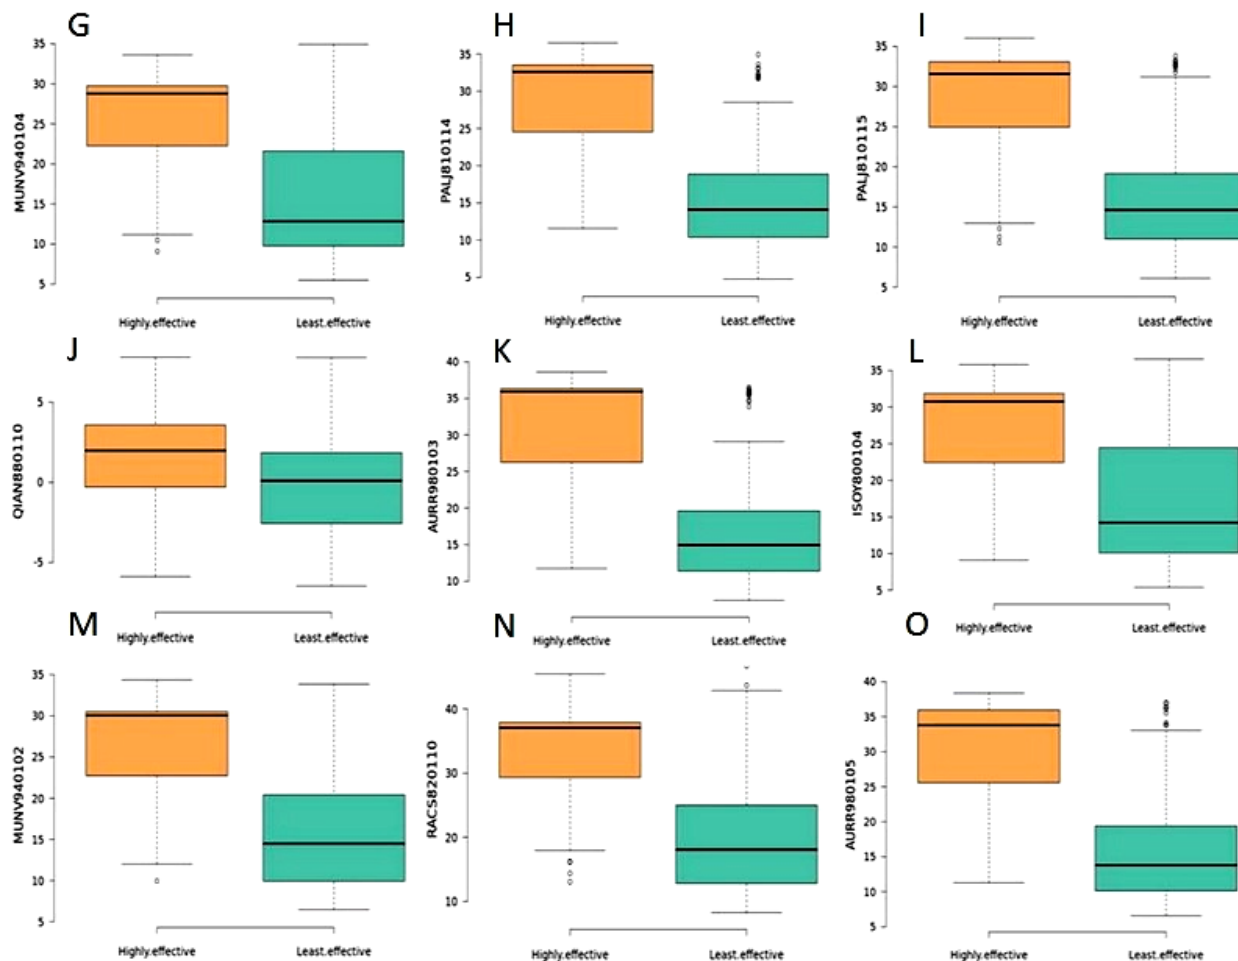

**Figure S2.** Box plots of 15 best performing physicochemical properties using SVM (see Table S3a) of 97 highly effective peptides ( $IC_{50} < 1\mu M$ ) and an equal number of least effective peptides ( $IC_{50} > 100\mu M$ ).

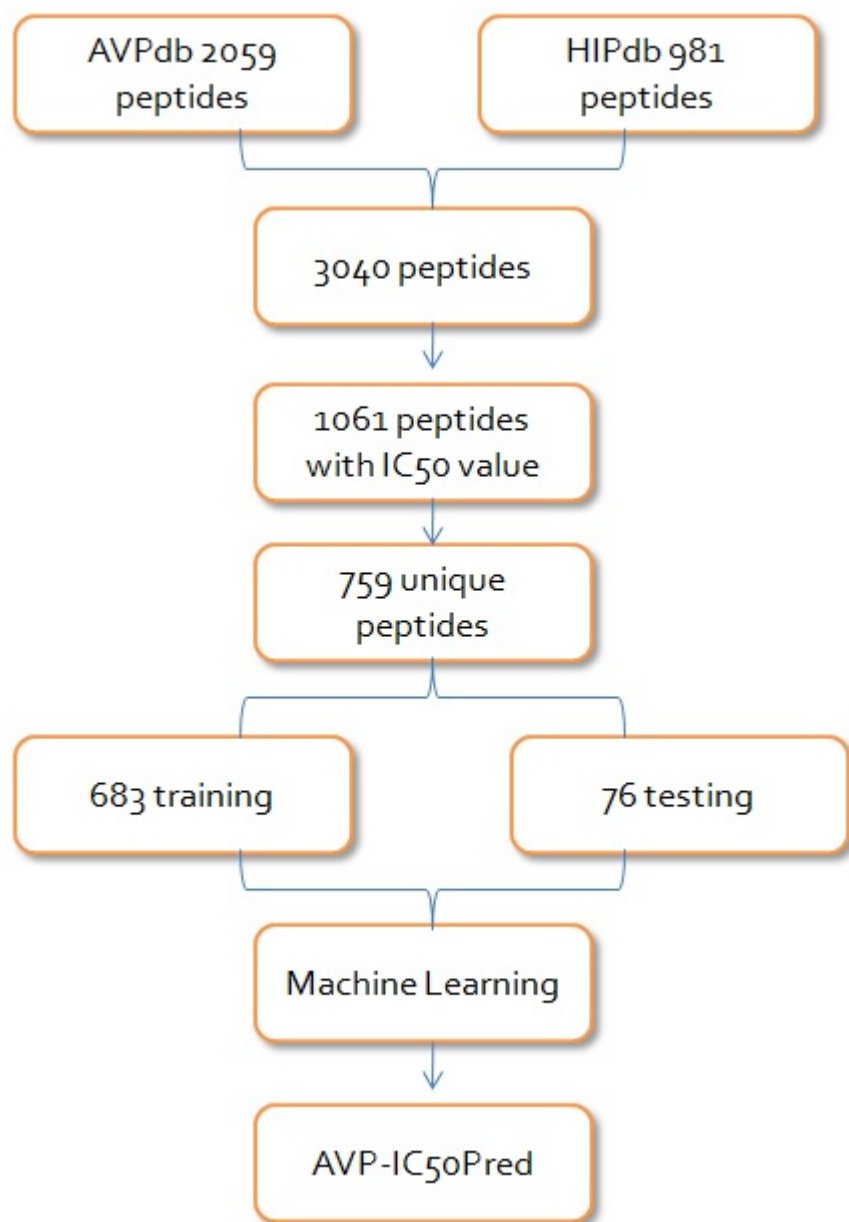

**Figure S3.** AVP-IC<sub>50</sub>Pred workflow for model development

Enter sequence below in FASTA format

```
>AVP-IC50-1  
SWLDDIWDWICEVLSDFE  
>AVP-IC50-2  
ANVVATYPAHS  
>AVP-IC50-3  
YQLLIRMIYKAI  
>AVP-IC50-4  
KQLTEAVQKITTESIVIWGK  
>AVP-IC50-5  
TWLRAIWDWVCTALDFK  
>AVP-IC50-6  
QLLIRMIYKNI
```

Paste your sequence in  
the FASTA format here

[Load example](#)

Reset

Or browse file from system

Choose File

no file selected

Choose Prediction Model:

- Amino acid composition
- Dipeptide composition
- Binary profile (N8/C8)
- Physicochemical properties
- Hybrid Model

Choose a  
prediction model

Select Machine Learning Techniques:

- Support Vector Machine (SVM<sup>light</sup>)
- Random Forest (R package)
- IBk (Weka)
- KStar (Weka)

Select the machine  
learning techniques

Run Prediction

**Figure S4.** AVP-IC<sub>50</sub>Pred submit form.

**Table S1.** Training/testing dataset used in the development of AVP-IC<sub>50</sub>Pred prediction models.

| AVPdb/HIPdb_ID | Sequence                             | Reference | IC50<br>(microM) | Virus  |
|----------------|--------------------------------------|-----------|------------------|--------|
| >AVP0003       | ECRSTSYAGAVVNDL                      | 3040743   | 42               | HSV 1  |
| >AVP0004       | STSYAGAVVNDL                         | 3040743   | 29               | HSV 1  |
| >AVP0006       | AGAVVNDL                             | 3040743   | 283              | HSV 1  |
| >AVP0012       | AAGAVVNDL                            | 3040743   | 280              | HSV 1  |
| >AVP0014       | ALLGRMKG                             | 7892246   | 10               | HBV    |
| >AVP0016       | GQPEEGAPCQVVLQGA                     | 8380075   | 3.5              | HSV 1  |
| >AVP0017       | RGILIHNTIFGEQVF                      | 8380075   | 7.5              | HSV 1  |
| >AVP0018       | YRWRGPTAAFLSLV                       | 8380075   | 9                | HSV 1  |
| >AVP0019       | SSSTSTQVQILSNAL                      | 8380075   | 0.8              | HSV 1  |
| >AVP0020       | RRLQVGGGTLKFFLT                      | 8380075   | 12               | HSV 1  |
| >AVP0021       | FLDSKAELEKARKILSEVGRWY               | 8521809   | 1                | SeV    |
| >AVP0088       | PDAVYLHRIDLGPISLERLDVGTNLGNIAIAKLED  | 8700906   | 100              | MV     |
| >AVP0089       | DAVYLHRIDLGPISLERLDVGTNLQNAIAKLEDA   | 8700906   | 100              | MV     |
| >AVP0090       | AVYLHRIDLGPISLERLDVGTNLQNAIAKLEDAK   | 8700906   | 100              | MV     |
| >AVP0091       | VYLHRIDLGPISLERLDVGTNLQNAIAKLEDAKE   | 8700906   | 85.3             | MV     |
| >AVP0092       | YLHRIDLGPISLERLDVGTNLGNIAIAKLEDAKEL  | 8700906   | 90.7             | MV     |
| >AVP0094       | HRIDLGPISLERLDVGTNLGNIAIAKLEDAKELLE  | 8700906   | 2.2              | MV     |
| >AVP0095       | RIDLGPISLERLDVGTNLGNIAIAKLEDAKELLES  | 8700906   | 1.7              | MV     |
| >AVP0096       | IDLGPISLERLDVGTNLGNIAIAKLEDAKELLESS  | 8700906   | 4.9              | MV     |
| >AVP0097       | DLGPISLERLDVGTNLGNIAIAKLEDAKELLESSD  | 8700906   | 5.7              | MV     |
| >AVP0098       | LGPPISLERLDVGTNLGNIAIAKLEDAKELLESSDQ | 8700906   | 6.5              | MV     |
| >AVP0099       | GPPISLERLDVGTNLGNIAIAKLEDAKELLESSDQI | 8700906   | 10.1             | MV     |
| >AVP0100       | PPISLERLDVGTNLGNIAIAKLEDAKELLESSDQIL | 8700906   | 1.1              | MV     |
| >AVP0101       | PISLERLDVGTNLGNIAIAKLEDAKELLESSDQILR | 8700906   | 3.1              | MV     |
| >AVP0102       | ISLERLDVGTNLGNIAIAKLEDAKELLESSDQILRS | 8700906   | 13               | MV     |
| >AVP0103       | SLERLDVGTNLGNIAIAKLEDAKELLESSDQILRSM | 8700906   | 12.3             | MV     |
| >AVP0105       | YTPNDITLNNVALDPIDISIELNKAKSDLEESKE   | 8700906   | 100              | HPIV 3 |

|          |                                     |         |      |        |
|----------|-------------------------------------|---------|------|--------|
| >AVP0106 | TPNDITLNNVALDPIDISIELNKAKSDLEESKEW  | 8700906 | 100  | HPIV 3 |
| >AVP0107 | PNDITLNNVALDPIDISIELNKAKSDLEESKEWI  | 8700906 | 100  | HPIV 3 |
| >AVP0108 | NDITLNNVALDPIDISIELNKAKSDLEESKEWIR  | 8700906 | 100  | HPIV 3 |
| >AVP0109 | DITLNNVALDPIDISIELNKAKSDLEESKEWIRR  | 8700906 | 100  | HPIV 3 |
| >AVP0110 | ITLNNVALDPIDISIELNKAKSDLEESKEWIRRS  | 8700906 | 62   | HPIV 3 |
| >AVP0111 | TLNNVALDPIDISIELNKAKSDLEESKEWIRRSN  | 8700906 | 72   | HPIV 3 |
| >AVP0112 | LNNVALDPIDISIELNKAKSDLEESKEWIRRSNQ  | 8700906 | 1    | HPIV 3 |
| >AVP0113 | NNSVALDPIDISIELNKAKSDLEESKEWIRRSNQK | 8700906 | 6    | HPIV 3 |
| >AVP0114 | NSVALDPIDISIELNKAKSDLEESKEWIRRSNQKL | 8700906 | 0.2  | HPIV 3 |
| >AVP0115 | SVALDPIDISIELNKAKSDLEESKEWIRRSNQKLD | 8700906 | 2    | HPIV 3 |
| >AVP0116 | VALDPIDISIELNKAKSDLEESKEWIRRSNQKLD  | 8700906 | 1    | HPIV 3 |
| >AVP0117 | ALDPIDISIELNKAKSDLEESKEWIRRSNQKLD   | 8700906 | 0.1  | HPIV 3 |
| >AVP0118 | LDPIDISIELNKAKSDLEESKEWIRRSNQKLD    | 8700906 | 0.03 | HPIV 3 |
| >AVP0119 | DPIDISIELNKAKSDLEESKEWIRRSNQKLD     | 8700906 | 0.2  | HPIV 3 |
| >AVP0120 | PIDISIELNKAKSDLEESKEWIRRSNQKLD      | 8700906 | 0.07 | HPIV 3 |
| >AVP0122 | DISIELNKAKSDLEESKEWIRRSNQKLD        | 8700906 | 2    | HPIV 3 |
| >AVP0123 | ISIELNKAKSDLEESKEWIRRSNQKLD         | 8700906 | 2    | HPIV 3 |
| >AVP0124 | SIELNKAKSDLEESKEWIRRSNQKLD          | 8700906 | 1    | HPIV 3 |
| >AVP0125 | IELNKAKSDLEESKEWIRRSNQKLD           | 8700906 | 2    | HPIV 3 |
| >AVP0127 | IIFYDPLVFPDEFDASISQVNEKINQSLAFIRK   | 8700906 | 91   | RSV    |
| >AVP0128 | INFYDPLVFPDEFDASISQVNEKINQSLAFIRKS  | 8700906 | 93   | RSV    |
| >AVP0129 | NFYDPLVFPDEFDASISQVNEKINQSLAFIRKSD  | 8700906 | 100  | RSV    |
| >AVP0130 | FYDPLVFPDEFDASISQVNEKINQSLAFIRKSDE  | 8700906 | 20   | RSV    |
| >AVP0131 | YDPLVFPDEFDASISQVNEKINQSLAFIRKSDEL  | 8700906 | 6    | RSV    |
| >AVP0132 | DPLVFPDEFDASISQVNEKINQSLAFIRKSDELL  | 8700906 | 8    | RSV    |
| >AVP0133 | PLVFPDEFDASISQVNEKINQSLAFIRKSDELLH  | 8700906 | 30   | RSV    |
| >AVP0135 | VFPDEFDASISQVNEKINQSLAFIRKSDELLHNV  | 8700906 | 19   | RSV    |
| >AVP0136 | FPSDEFDASISQVNEKINQSLAFIRKSDELLHNVN | 8700906 | 8    | RSV    |
| >AVP0137 | PSDEFDASISQVNEKINQSLAFIRKSDELLHNVNA | 8700906 | 6    | RSV    |
| >AVP0138 | SDEFDASISQVNEKINQSLAFIRKSDELLHNVNAG | 8700906 | 6    | RSV    |

|          |                                       |          |       |        |
|----------|---------------------------------------|----------|-------|--------|
| >AVP0140 | EFDASISQVNEKINQSLAFIRKSDELLHNVNAGKS   | 8700906  | 13    | RSV    |
| >AVP0142 | DASISQVNEKINQSLAFIRKSDELLHNVNAGKSTT   | 8700906  | 8     | RSV    |
| >AVP0143 | FDASISQVNEKINQSLAFIRKSDELLHNVNAGKST   | 8700906  | 0.051 | RSV    |
| >AVP0144 | IDISIELNKAKSDLEESKEWIRRSNQKLDSIGNWH   | 8700906  | 0.015 | MV     |
| >AVP0145 | LHRIDLGPPISELERLDVGTNLGNIAKLEDAKELL   | 8700906  | 0.068 | HPIV 3 |
| >AVP0146 | DLSNQINSINKSLKSAEDWIADSNFFANQARTAK    | 8806544  | 5.1   | HPIV 2 |
| >AVP0147 | ELNKAKSDLEESKEWIRRSNQKLDSIGNWHQSSTT   | 8806544  | 2.2   | HPIV 3 |
| >AVP0159 | ISLERLDVGTNLGNIAKLEDAKELLESSDQILRSM   | 9010292  | 0.02  | MV     |
| >AVP0168 | SLLGRMKGA                             | 9843489  | 2.4   | HBV    |
| >AVP0169 | SLLGRMKG                              | 9843489  | 6.4   | HBV    |
| >AVP0172 | CRFPNITNSHVPILQERPPLENRVLTGWGL        | 10516085 | 2.5   | HTLV 1 |
| >AVP0173 | KGSVVIVGRIILSGRK                      | 10574908 | 5.7   | HCV    |
| >AVP0174 | VRLGSISVIGIVRGKK                      | 10574908 | 137   | HCV    |
| >AVP0175 | RGGSVVIVGRIILSGRK                     | 10574908 | 3.4   | HCV    |
| >AVP0177 | RRKKAVALLPVLLALLAP                    | 11222686 | 0.7   | HSV 1  |
| >AVP0179 | CTLTTKLYC                             | 12021868 | 1     | NDV    |
| >AVP0182 | FKLRKIKVRLRAKIKL                      | 12208971 | 0.46  | FIV    |
| >AVP0184 | FLAAARIAKRVAKKARKLAKRAARKRK           | 12208971 | 0.94  | FIV    |
| >AVP0185 | FRFKIKFRLKFRFKARFKFRAKFRA             | 12208971 | 1.32  | FIV    |
| >AVP0186 | FAVGLRAIKRALKKLRRGVKVAKDL             | 12208971 | 5.47  | FIV    |
| >AVP0187 | KRKRAVKRVGRRLKKLARKIARLGVAKLAGLRAVKLF | 12208971 | 3.38  | FIV    |
| >AVP0188 | GAKKGAKKGKKGAKKGAGAKGAGAFKFKK         | 12208971 | 4.07  | FIV    |
| >AVP0189 | FAKKFAKKFKKFAKKFAKFAFAF               | 12208971 | 3.05  | FIV    |
| >AVP0191 | FLFAFRIFKRVFKKFRKLFKRAF               | 12208971 | 10.51 | FIV    |
| >AVP0192 | KRKRAVKRVGRRLKKLARKIARLGVAF           | 12208971 | 7.82  | FIV    |
| >AVP0194 | FALALKALKKALKKALKKALKKAL              | 12208971 | 7.07  | FIV    |
| >AVP0195 | FAIAIKAIKKAIKKIKKAIKKAI               | 12208971 | 8.71  | FIV    |
| >AVP0196 | FKVKAKVKAKVKAKVKAKKKK                 | 12208971 | 2.85  | FIV    |
| >AVP0197 | AVKRVGRRLKKLARKIARLGVAF               | 12208971 | 3.37  | FIV    |
| >AVP0200 | PLSPPLRNTHPQAMQWNSTTF                 | 12469306 | 30    | HBV    |

|          |                                     |          |        |          |
|----------|-------------------------------------|----------|--------|----------|
| >AVP0201 | PTSNHSPTSCPPTCPGYRWMCLRRF           | 12469306 | 35     | HBV      |
| >AVP0202 | LPRRLHLEPAFLPYSVKAHECC              | 12857903 | 11     | HCMV     |
| >AVP0204 | EQVLKAVTNVLSVPFPGGET                | 12857903 | 280    | HCMV     |
| >AVP0207 | RRLHLEPAFLPYSVKAHECC                | 12857903 | 20     | HCMV     |
| >AVP0208 | LPRRLHLEPAFLPYSVKAHEC               | 12857903 | 75     | HCMV     |
| >AVP0210 | QLESLTDRELLLIARKTCGSVE              | 12912982 | 1      | EBoV     |
| >AVP0214 | ACFPWGNTWCGGK                       | 12951030 | 13     | HCV      |
| >AVP0216 | ACFPWGKEYCGGK                       | 12951030 | 22     | HCV      |
| >AVP0218 | ACFPWGNQWCGGK                       | 12951030 | 6      | HCV      |
| >AVP0421 | AALEAKICHQIEYYFGDF                  | 15016896 | 6.688  | HCV      |
| >AVP0422 | KWKVFKKIEKMGRNIRNGIVKAGPAIAVLGEAKAL | 15081088 | 3.4    | JV       |
| >AVP0423 | KVLTTGLPALISWIKRKRQQ                | 15081088 | 0.86   | JV       |
| >AVP0424 | GIGKFLHSAGKFGKAFVGEIMKS             | 15081088 | 36.59  | HSV 1    |
| >AVP0426 | ILPWKWPWWPWRR                       | 15081088 | 28.68  | HSV 1    |
| >AVP0427 | ILMCFSIDSPDSLEN                     | 15113882 | 1.132  | RSV      |
| >AVP0428 | ILMAFSIDSPDSLEN                     | 15113882 | 72.368 | RSV      |
| >AVP0429 | ILMCFINSNSLQN                       | 15113882 | 70.875 | RSV      |
| >AVP0430 | GSRVQIRCRFRNSTR                     | 15130536 | 19     | HSV 1    |
| >AVP0460 | YDHIQDHVNTMFSRLATSWCLLQNKERALWAEAA  | 15269351 | 5      | BoHV 1   |
| >AVP0463 | FNLSDHSESIQKKFQLMKEHVNKIG           | 15564453 | 0.17   | ASLV-A   |
| >AVP0464 | SDHSESIQKKFQLMKEHVNKIGVDS           | 15564453 | 5      | ASLV-A   |
| >AVP0548 | GYHLMSFPQAAPHGVVFLHVTW              | 16616792 | 2      | SARS-CoV |
| >AVP0549 | GVFVFNGTSWFITQRNFFS                 | 16616792 | 2      | SARS-CoV |
| >AVP0553 | GYFVQDDGEWKFTGSSYYY                 | 16616792 | 4      | MHV      |
| >AVP0583 | SWLRDIWDWICEVLS                     | 18287023 | 0.98   | HCV      |
| >AVP0584 | SWLRDIWDWICEVLSDFK                  | 18287023 | 0.79   | HCV      |
| >AVP0585 | WICEVLSDFK                          | 18287023 | 27     | HCV      |
| >AVP0586 | CEVLSDFK                            | 18287023 | 27     | HCV      |
| >AVP0587 | SGSWLRDIWDWICEVLSDFK                | 18287023 | 1.7    | HCV      |
| >AVP0588 | GSWLRDIWDWICEVLSDFK                 | 18287023 | 0.51   | HCV      |

|          |                       |          |      |     |
|----------|-----------------------|----------|------|-----|
| >AVP0589 | SWLRDIWDWICEVLSDFKT   | 18287023 | 1.7  | HCV |
| >AVP0590 | SWLRDIWDWICEVLSDFKTW  | 18287023 | 0.51 | HCV |
| >AVP0591 | SWRLIDWDWICEVLSDFK    | 18287023 | 4    | HCV |
| >AVP0595 | SWLRDIWDWICEVL        | 18287023 | 11.3 | HCV |
| >AVP0596 | VLDLIYSLHKQINRGLKKIVL | 18287023 | 36   | HCV |
| >AVP0598 | KFDSLVECIWDWIDRLWS    | 18287023 | 0.48 | HCV |
| >AVP0600 | SIWRDWVDLICEFLSDWK    | 18287023 | 0.4  | HCV |
| >AVP0602 | SWLRDVWDWVCTILTDFK    | 18287023 | 2.1  | HCV |
| >AVP0603 | DWLRHWDWVCSVVSDFK     | 18287023 | 0.55 | HCV |
| >AVP0606 | SWLRDIWDWICEV         | 18287023 | 27   | HCV |
| >AVP0608 | SWLRDIWDWISEVLSDFK    | 18287023 | 13.5 | HCV |
| >AVP0609 | SWLRDIWDWIREVLSDFK    | 18287023 | 12.5 | HCV |
| >AVP0610 | SWLRDIWDWIEEVLSDFK    | 18287023 | 13   | HCV |
| >AVP0613 | SWLRDIWDWICKVLSDFK    | 18287023 | 6.8  | HCV |
| >AVP0614 | SWLDRIWRWICKVLSRFE    | 18287023 | 1.7  | HCV |
| >AVP0615 | SWLRDIWRWICKVLSRFK    | 18287023 | 0.84 | HCV |
| >AVP0616 | SWLRRIRWICKVLSRFK     | 18287023 | 0.89 | HCV |
| >AVP0617 | SWLRDIWDWICE          | 18287023 | 27   | HCV |
| >AVP0618 | SWLRDIWDWI            | 18287023 | 27   | HCV |
| >AVP0619 | SWLRDIWD              | 18287023 | 27   | HCV |
| >AVP0620 | LRDIWDWICEVLSDFK      | 18287023 | 27   | HCV |
| >AVP0621 | DIWDWICEVLSDFK        | 18287023 | 27   | HCV |
| >AVP0622 | WDWICEVLSDFK          | 18287023 | 27   | HCV |
| >AVP0623 | RTQRRGRTGRGKPGIYR     | 18479669 | 27.1 | HCV |
| >AVP0624 | STQRRGRTGRGRRGIYR     | 18479669 | 24.3 | HCV |
| >AVP0625 | RRGRTGRGRRGIYR        | 18479669 | 0.2  | HCV |
| >AVP0626 | RTGRGRRGIYR           | 18479669 | 34.6 | HCV |
| >AVP0627 | RGRRGIYR              | 18479669 | 313  | HCV |
| >AVP0633 | AAQRRGRIGRNPSQVGD     | 18479669 | 358  | HCV |
| >AVP0636 | RVGRNPNQVGD           | 18479669 | 374  | HCV |



|          |                                |          |       |        |
|----------|--------------------------------|----------|-------|--------|
| >AVP0637 | RRGRVGRNPNQVGD                 | 18479669 | 196   | HCV    |
| >AVP0638 | AAQRRGRVGRNPNQVGD              | 18479669 | 442   | HCV    |
| >AVP0652 | RNPSQVGD                       | 18479669 | 383   | WNV    |
| >AVP0653 | RIGRNPSQVGD                    | 18479669 | 285   | WNV    |
| >AVP0654 | RRGRIGRNPSQVGD                 | 18479669 | 156   | WNV    |
| >AVP0674 | AAHLIDALYAEFLGGRVLT            | 18572274 | 250   | HSV 1  |
| >AVP0675 | GLASTLTRWAHYNALIRAF            | 18572274 | 250   | HSV 1  |
| >AVP0677 | CCFLRIQNDSIIRLGDLQPLSQRVSTDWQ  | 18680566 | 3.49  | BKV    |
| >AVP0816 | CCFLNITNSHVSILQERPPLENRVLTGWGL | 19114713 | 0.18  | HTLV 1 |
| >AVP0817 | LNITNSHVSILQERPPLENRVL         | 19114713 | 5.8   | HTLV 1 |
| >AVP0818 | CFLNITNSHVSILQERPPLENRV        | 19114713 | 0.19  | HTLV 1 |
| >AVP0820 | CFLNITNSHVSILQEAPPLENAV        | 19114713 | 8.5   | HTLV 1 |
| >AVP0961 | GWWYKGRARPVSAVA                | 19558186 | 3.2   | INFV A |
| >AVP0962 | RAVWRHSVATPSHSV                | 19558186 | 6.5   | INFV A |
| >AVP0963 | GAWYKGRARPVSAVA                | 19558186 | 53    | INFV A |
| >AVP0964 | GWWYKGRARA VSAVA               | 19558186 | 89    | INFV A |
| >AVP0965 | AVASVPRARGKYWWG                | 19558186 | 44    | INFV A |
| >AVP0966 | DFRRLPGAFWQLRQP                | 19558186 | 52    | INFV A |
| >AVP0967 | AETVESCLAKPHTEN                | 19558186 | 66    | INFV A |
| >AVP0978 | VNPTLLFLKVPAQNAISTTFPYT        | 19841738 | 0.662 | INFV A |
| >AVP0979 | PTLLFLKVPAQNAISTTFPYT          | 19841738 | 0.483 | INFV A |
| >AVP0980 | LLFLKVPAQNAISTTFPYT            | 19841738 | 3     | INFV A |
| >AVP0981 | FLKVPAQNAISTTFPYT              | 19841738 | 3     | INFV A |
| >AVP0982 | KVPAQNAISTTFPYT                | 19841738 | 3     | INFV A |
| >AVP0983 | MDVNPTLLFLKVPAQNAIST           | 19841738 | 0.034 | INFV A |
| >AVP0984 | MDVNPTLLFLKVPAQNAI             | 19841738 | 0.029 | INFV A |
| >AVP0986 | MDVNPTLLFLKVPAQ                | 19841738 | 0.043 | INFV A |
| >AVP0987 | MDVNPTLLFLKVPA                 | 19841738 | 0.035 | INFV A |
| >AVP0988 | MDVNPTLLFLKVP                  | 19841738 | 0.138 | INFV A |
| >AVP0989 | MDVNPTLLFLKV                   | 19841738 | 0.644 | INFV A |

|          |                                  |          |       |        |
|----------|----------------------------------|----------|-------|--------|
| >AVP0990 | MDVNPTLLFLK                      | 19841738 | 0.899 | INFV A |
| >AVP0992 | MDVNPTLLF                        | 19841738 | 3     | INFV A |
| >AVP0993 | MDVNPTLL                         | 19841738 | 3     | INFV A |
| >AVP0997 | MNINPTLLFLKVPIQ                  | 19841738 | 0.007 | INFV A |
| >AVP0998 | MDVNPTLLFIDVPAQ                  | 19841738 | 3     | INFV A |
| >AVP0999 | MNINPTLLFLKVPAQ                  | 19841738 | 0.013 | INFV A |
| >AVP1001 | MDVNPTFLFLKVPAQ                  | 19841738 | 3     | INFV A |
| >AVP1002 | MDVNPYLLFLKVPAQ                  | 19841738 | 0.022 | INFV A |
| >AVP1003 | MDVNPFLFLKVPAQ                   | 19841738 | 0.003 | INFV A |
| >AVP1004 | MDVNPWLLFLKVPAQ                  | 19841738 | 0.003 | INFV A |
| >AVP1005 | MDVNPHELLFLKVPAQ                 | 19841738 | 0.292 | INFV A |
| >AVP1006 | MDVNPCLLFLKVPAQ                  | 19841738 | 0.044 | INFV A |
| >AVP1008 | MNINPYPLFIDVPIQ                  | 19841738 | 0.045 | INFV B |
| >AVP1056 | RWMVVRHWFHRLRLPYNPGKNKQSQWP      | 20582308 | 8     | DENV 2 |
| >AVP1057 | RQMRAWGQDYQHGGMGYSC              | 20582308 | 36    | DENV 2 |
| >AVP1059 | RRRRRRRRHPAEPGSTVTTQNTASQTMS     | 20686048 | 20    | ASFV   |
| >AVP1118 | ASLRVRIKKQ                       | 21576348 | 0.21  | HSV 1  |
| >AVP1160 | CEELRVRLASHLRKLRKRLRDADDLQKRLAVY | 22334503 | 0.5   | HCV    |
| >AVP1161 | EELRVRLASHLRKLRKRLRDADDLQKRLAVY  | 22334503 | 10    | HCV    |
| >AVP1162 | CEEIRARLSTHLRKMRLMRDADDLQKRLAVY  | 22334503 | 10    | HCV    |
| >AVP1163 | CEEQAQQIRLQAEAFQARLKSWEPLVEDM    | 22334503 | 10    | HCV    |
| >AVP1164 | CVRLASHLRKLRKRLRDADDL            | 22334503 | 10    | HCV    |
| >AVP1165 | CIRLQAEAFQARLKSWEPLV             | 22334503 | 10    | HCV    |
| >AVP1167 | LRVRLASHLRKLRKRLRDADDLQKRLAVY    | 22334503 | 10    | HCV    |
| >AVP1168 | EELRVRLASHLRKLRKRLRDADDL         | 22334503 | 10    | HCV    |
| >AVP1169 | VRASHLRKLRKRLRDADDLQKRLAVY       | 22334503 | 10    | HCV    |
| >AVP1170 | CVRLASHLRKLRKRLRDADDLQKRLAVY     | 22334503 | 0.8   | HCV    |
| >AVP1171 | CLRVRLASHLRKLRKRLRDADDL          | 22334503 | 4     | HCV    |
| >AVP1172 | CLRKLRKRLRC                      | 22334503 | 10    | HCV    |
| >AVP1175 | LLGFILAFLGWIGAIYST               | 22378192 | 4.3   | HCV    |

|          |                                      |          |       |        |
|----------|--------------------------------------|----------|-------|--------|
| >AVP1176 | FILAF LGWIGAI VSTALP                 | 22378192 | 8.9   | HCV    |
| >AVP1177 | AFLGWIGAI VSTALPQWR                  | 22378192 | 12.5  | HCV    |
| >AVP1178 | GWIGAI VSTALPQWRIYS                  | 22378192 | 21.5  | HCV    |
| >AVP1180 | VSTALPQWRIYSYAGDNI                   | 22378192 | 25    | HCV    |
| >AVP1181 | ALPQWRIYSYAGDNIVTA                   | 22378192 | 25    | HCV    |
| >AVP1183 | MANAGLQLLGFILAF L                    | 22378192 | 7.6   | HCV    |
| >AVP1185 | MANAGLQLLGFILAF LGWIGAI              | 22378192 | 4     | HCV    |
| >AVP1186 | MANAGLQLLGFILAF LGWIGAI VS           | 22378192 | 5.1   | HCV    |
| >AVP1188 | AGALMFAWLLLGLQGIF N                  | 22378192 | 25    | HCV    |
| >AVP1189 | MASAGMQILGVVLTLLGW                   | 22378192 | 25    | HCV    |
| >AVP1190 | MANSGLQLLGF SMALLGW                  | 22378192 | 25    | HCV    |
| >AVP1191 | MASTGLELLGMTLAVLWG                   | 22378192 | 25    | HCV    |
| >AVP1192 | ATSSANSKA                            | 22465300 | 10    | JEV    |
| >AVP1208 | CAGKRKSG                             | 22780881 | 6.7   | DENV 2 |
| >AVP1210 | ASLRVRIKK                            | 22850525 | 0.25  | RSV    |
| >AVP1211 | GELGRLVYLLDGPYDPIHCSLAYGDASTLVVF     | 22965230 | 0.021 | HCV    |
| >AVP1212 | GELGRLVYLLDGPYDPI                    | 22965230 | 0.125 | HCV    |
| >AVP1213 | HCSLAYGDASTLVVF                      | 22965230 | 0.001 | HCV    |
| >AVP1214 | GELGRP VYVLGDPGYYATHCIYATTNDALIFSV   | 22965230 | 0.026 | HCV    |
| >AVP1216 | HCIYATTNDALIFSV                      | 22965230 | 0.001 | HCV    |
| >AVP1217 | GELGRIPSDTYDLAVGALHCPFYLVSGLVYLDG    | 22965230 | 0.001 | HCV    |
| >AVP1218 | GELGRLVYLLDGPYDPIHCDVVTRGGSHLFNF     | 22965230 | 0.011 | HCV    |
| >AVP1219 | GELDELVYLLDGPYDPIHCDVVTRGGSRLFNF     | 22965230 | 0.001 | HCV    |
| >AVP1220 | GELGRLVYLLDGPYDPIHCD                 | 22965230 | 0.124 | HCV    |
| >AVP1221 | GELDELVYLLDGPYDPIHS                  | 22965230 | 0.023 | HCV    |
| >AVP1222 | RQIKINFQNRMRMKNKKGELDELVYLLDGPYDPIHS | 22965230 | 0.024 | HCV    |
| >AVP1223 | LLDCWVRLGRYLLRRLKT                   | 23175359 | 10    | HCV    |
| >AVP1224 | LLDCWVRLGRYLLRRLKTPFTRL              | 23175359 | 15    | HCV    |
| >AVP1225 | LLDCWVRLGRYLLRRLKTPFT                | 23175359 | 20    | HCV    |
| >AVP1226 | LLDCWVRLGRYLLRRLKTP                  | 23175359 | 3     | HCV    |

|          |                                   |           |         |          |
|----------|-----------------------------------|-----------|---------|----------|
| >AVP1227 | LLDCWVRLGRYLLRRLK                 | 23175359  | 5       | HCV      |
| >AVP1228 | LDCWVRLGRYLLRRLKTPFTRL            | 23175359  | 20      | HCV      |
| >AVP1230 | LDCWVRLGRYLLRRLKTP                | 23175359  | 4       | HCV      |
| >AVP1232 | CWVRLGRYLLRRLKTPFT                | 23175359  | 2       | HCV      |
| >AVP1233 | WVRLGRYLLRRLKTPFTR                | 23175359  | 12      | HCV      |
| >AVP1234 | VRLGRYLLRRLKTPFTRL                | 23175359  | 20      | HCV      |
| >AVP1235 | MAILGDTAWDFGSLGGVFTSIGKALHQVFGAIY | 23226444  | 3.5     | DENV 2   |
| >AVP1250 | HGLASTLTRWAHYNALIRAF              | 23429490  | 0.1     | HSV 1    |
| >AVP1365 | GSLGRMKGA                         | US6544520 | 0.79    | HBV      |
| >AVP1367 | ADGSLGRMKGAAG                     | US6544520 | 4.5     | HBV      |
| >AVP1369 | RSLGRMKGA                         | US6544520 | 0.29    | HBV      |
| >AVP1370 | HRSLGRMKGA                        | US6544520 | 0.5     | HBV      |
| >AVP1371 | MHRSLGRMKGA                       | US6544520 | 0.8     | HBV      |
| >AVP1477 | FKLPLGINITNFRAILTAFS              | US7491489 | 266.434 | SARS-CoV |
| >AVP1478 | PTTFMLKYDENGTTITDAVDC             | US7491489 | 60.018  | SARS-CoV |
| >AVP1479 | VLYNSTFFSTFKCYGVSATK              | US7491489 | 262.667 | SARS-CoV |
| >AVP1480 | PALNCYWPLNDYGFYTTSGI              | US7491489 | 258.33  | SARS-CoV |
| >AVP1482 | YQDVNCTDVSTAIHADQLTP              | US7491489 | 61.704  | SARS-CoV |
| >AVP1483 | SNNTIAIPTNFSISITTEVM              | US7491489 | 278.801 | SARS-CoV |
| >AVP1484 | QYGSFCTQLNRALSGLIAAEQ             | US7491489 | 13.854  | SARS-CoV |
| >AVP1485 | GIGVTQNVLYENQKQIANQF              | US7491489 | 262.539 | SARS-CoV |
| >AVP1487 | IPESSELTLQELLGEERR                | 15182185  | 10.5    | HPV      |
| >AVP1490 | YKFACPECPKRFMRSDHLSKHITLHELLGEERR | 15182185  | 19.3    | HPV      |
| >AVP1492 | ALQELLGQWLKDDGGPSSGRPPPS          | 15182185  | 36.8    | HPV      |
| >AVP1493 | ALQELLGEYIQWLKDDGGPSSGRPPPS       | 15182185  | 26.2    | HPV      |
| >AVP1494 | YLQELLGE                          | 15182185  | 74.3    | HPV      |
| >AVP1505 | SWLRDLWDWICEVLSDFK                | 21801309  | 1.4     | HCV      |
| >AVP1506 | SWLRDIWDWLCEVLSDFK                | 21801309  | 1.2     | HCV      |
| >AVP1507 | SWLRDIWDWICELLSDFK                | 21801309  | 1.2     | HCV      |
| >AVP1508 | SWLRDLWDWLCEVLSDFK                | 21801309  | 1.4     | HCV      |

|          |                                       |          |        |          |
|----------|---------------------------------------|----------|--------|----------|
| >AVP1509 | SWLRDLWDWICELLSDFK                    | 21801309 | 0.78   | HCV      |
| >AVP1511 | SWLRDLWDWLCELLSDFK                    | 21801309 | 1.2    | HCV      |
| >AVP1513 | SWLRDIWDWVCEVLSDFK                    | 21801309 | 1.4    | HCV      |
| >AVP1514 | SWLRDIWDWACEVLSDFK                    | 21801309 | 4      | HCV      |
| >AVP1515 | SWLRDIWDWGCEVLSDFK                    | 21801309 | 5      | HCV      |
| >AVP1516 | SWLRDIWDWSCEVLSDFK                    | 21801309 | 5      | HCV      |
| >AVP1517 | SWLRDIWDWECEVLSDFK                    | 21801309 | 5      | HCV      |
| >AVP1518 | SWLRDIWDWKCEVLSDFK                    | 21801309 | 5      | HCV      |
| >AVP1527 | KNGRKLCLDLQAALY                       | 20347875 | 27.855 | VACV     |
| >AVP1528 | AALYKKKIIKKLLES                       | 20347875 | 33.871 | VACV     |
| >AVP1558 | VYTDKVDISSQISSMNQSLQQSKDYIKEAQKILDTV  | 16973588 | 0.04   | HeV      |
| >AVP1560 | VALDPIDISIELNKAKSDLEESKEWIRRSNQKLDSI  | 16973588 | 0.008  | HeV      |
| >AVP1565 | VALDPIDISIELNKAKSDLEESKEWIRR          | 16973588 | 10     | HeV      |
| >AVP1572 | VANDPIDISIELNKAKSDLEESKEWIRRSNQKLDSI  | 16973588 | 0.75   | HPIV 3   |
| >AVP1573 | VALDPIDISIELNKAKSDLEESKEWIRRSNQKLDS   | 16973588 | 0.35   | HPIV 3   |
| >AVP1574 | VANDPIDISIELNKAKSDLEESKEWIRRSNQKLDS   | 16973588 | 0.75   | HPIV 3   |
| >AVP1578 | KVDISSQISSMNQSLQQSKDYIKEAQRLLDTVNPSL  | 16026621 | 0.013  | NiV      |
| >AVP1579 | FWFTLIKTQAKQPARYRRFC                  | 21093488 | 3      | DENV 2   |
| >AVP1583 | GINASVVNIQKEIDRLNEVAKNLNESLIDLQELGKYE | 18983873 | 0.62   | SARS-CoV |
| >AVP1584 | GINASVVNIQKEIDRLNEVAKNLNESLIDL        | 18983873 | 0.8    | SARS-CoV |
| >AVP1585 | GINASVVNIQKEIDRLNEVAKNL               | 18983873 | 1.04   | SARS-CoV |
| >AVP1641 | KKKKYRNIRRP                           | 18383098 | 33.889 | SARS-CoV |
| >AVP1695 | CPFVKTQLC                             | 17441904 | 263    | SNV      |
| >AVP1700 | FLHFLHHLF                             | 23415044 | 0.811  | HCV      |
| >AVP1701 | FLGFLHHLF                             | 23415044 | 1.115  | HCV      |
| >AVP1702 | FLGFLKNLF                             | 23415044 | 1.965  | HCV      |
| >AVP1705 | ISGINASVVNIQEEIKLNEEAKKLNESLIDLQEL    | 17942557 | 0.004  | SARS-CoV |
| >AVP1706 | ISGINASVVNIQKEIDRLNEVAKNLNESLIDLQEL   | 17942557 | 0.005  | SARS-CoV |
| >AVP1707 | IEEINKKVEEIQKKIEELNKAELNKKLEELQKK     | 17942557 | 100    | SARS-CoV |
| >AVP1708 | PRPISYLKGSSEGPL                       | 22910295 | 5      | HCV      |

|          |                                   |          |         |             |
|----------|-----------------------------------|----------|---------|-------------|
| >AVP1716 | TLKPIFKLPLGINITNFR                | 19853613 | 11      | SARS-CoV    |
| >AVP1718 | YENQKQIANQFNKAIQIQESLTTTSTA       | 18442051 | 1.16    | SARS-CoV    |
| >AVP1722 | FGGASCCLYCRCHIDHPNPKGFCDLKGKY     | 22659295 | 160     | SARS-CoV    |
| >AVP1723 | GGASCCLYCRCH                      | 22659295 | 160     | SARS-CoV    |
| >AVP1727 | HRILMRIRAMMT                      | 22743126 | 34.136  | PRRSV       |
| >AVP1728 | HRALMRIRQMMT                      | 22743126 | 34.181  | PRRSV       |
| >AVP1729 | HRILMRIR                          | 22743126 | 43.502  | PRRSV       |
| >AVP1730 | HRIAMRIRQMMT                      | 22743126 | 54.587  | PRRSV       |
| >AVP1731 | HRILMRIRQMMT                      | 22743126 | 56      | PRRSV       |
| >AVP1732 | ARILMRIRQMMT                      | 22743126 | 56.123  | PRRSV       |
| >AVP1733 | HRILMRIRQAMT                      | 22743126 | 57.981  | PRRSV       |
| >AVP1737 | HRILMRIRQMMMA                     | 22743126 | 89.412  | PRRSV       |
| >AVP1738 | HRILMRIRQMAT                      | 22743126 | 120.524 | PRRSV       |
| >AVP1739 | HRILMRARQMMT                      | 22743126 | 150.141 | PRRSV       |
| >AVP1740 | LMRIRQMMT                         | 22743126 | 263.81  | PRRSV       |
| >AVP1741 | HRILARIRQMMT                      | 22743126 | 435.5   | PRRSV       |
| >AVP1756 | WLVFFVIFYFFR                      | 22258859 | 0.094   | INFLUENZA A |
| >AVP1757 | AWDFGSLGGVFTSIGKALHQVFGAIYGAA     | 20881042 | 0.1     | DENV 1      |
| >AVP1758 | AWDFGSVGGLVNSLGLKMHQVFGSAYTAL     | 20881042 | 0.1     | DENV 1      |
| >AVP1759 | RRKKIFYFFR                        | 22258859 | 0.155   | INFLUENZA A |
| >AVP1762 | HVTTTTFAPPPR                      | 21176936 | 9.054   | TGEV        |
| >AVP1764 | FKPSSPSSITLW                      | 21176936 | 17.489  | TGEV        |
| >AVP1765 | ATCYCRTGRCATRESLSGVCRISGRLYRLCCR  | 23269800 | 8.226   | HSV 2       |
| >AVP1766 | ATCYCRTGRCATRESLSGVCEISGRLYRLCCR  | 23269800 | 11.62   | HSV 2       |
| >AVP1767 | ATCYCRTGRCATRESLSGVCEIRGRLYRLCCR  | 23269800 | 11.683  | HSV 2       |
| >AVP1768 | ATCYCRRGRCATRESLSGVCEISGRLYRLCCR  | 23269800 | 13.041  | HSV 2       |
| >AVP1770 | ALNCYWPLNDYGFYTTTIGIGYQPYRVVLSFEL | 16153058 | 41.6    | SARS-CoV    |
| >AVP1772 | ATCYCRTGRCATRESRSGVCEISGRLYRLCCR  | 23269800 | 21.93   | HSV 2       |
| >AVP1790 | AWDFGSIGGVFTSVGKLVHQVFGTAYGVL     | 20881042 | 1.5     | DENV 1      |
| >AVP1797 | AWDFGSVGGLFTSLGKAVHQVFGSVYTIM     | 20881042 | 6       | DENV 4      |

|          |                                       |          |       |          |
|----------|---------------------------------------|----------|-------|----------|
| >AVP1801 | NADIIKSLIRKTIINASKNTASLSILQHLYVLR     | 21518442 | 12    | MDV      |
| >AVP1802 | HMNASDMEIKSYINMIESVEESSNYDF           | 21518442 | 4     | MDV      |
| >AVP1804 | CTEEHIVATELVIQEMYIKINVKNSP            | 21518442 | 8     | MDV      |
| >AVP1805 | RIILGQCICKREAEAAIEQIFRTKYND           | 21518442 | 9     | MDV      |
| >AVP1808 | FFVIFYRRKK                            | 22258859 | 1.482 | INFV A   |
| >AVP1811 | GICRCICGRGICRCICGRIGRVPVGVGVGHHHHH    | 23171075 | 21.4  | DENV 2   |
| >AVP1814 | LESEVTAIKNALKKTNEAVSTLGNVRLATAVRE     | 17967906 | 3.24  | hMPV     |
| >AVP1816 | FNVALDQVFESIENSQALVDQSNRILSSAE        | 17967906 | 9     | hMPV     |
| >AVP1817 | FNVALDQVFESIENSQALVDQSNRILSSAEGN      | 17967906 | 9     | hMPV     |
| >AVP1818 | NVALDQVFESIENSQALVDQSNRILSSA          | 17967906 | 9     | hMPV     |
| >AVP1820 | LFRLIKSLIKRLVSAFK                     | 22791717 | 11    | HBV      |
| >AVP1821 | RGGRLCYCRRRFCVCVGR                    | 23093838 | 11.7  | DENV 2   |
| >AVP1831 | SISNALNKLEESNRNLDKVNVKLT              | 12127571 | 3.27  | NDV      |
| >AVP1832 | KQNAANILRLKESIAATNEAVHEV              | 12127571 | 0.023 | NDV      |
| >AVP1849 | FKCRRWQWRMKKLGAPSITCVRAFA             | 17481742 | 9.7   | HPV      |
| >AVP1855 | CNDFRSKTC                             | 19497129 | 48    | AIV      |
| >AVP1857 | NGIGVTQNVLYENQKQIANQFNKAISQIQESLTTSTA | 15184046 | 0.14  | SARS-CoV |
| >AVP1858 | IQKEIDRLNEVAKNLNESLIDLQELGK           | 15184046 | 1.19  | SARS-CoV |
| >AVP1924 | TDVILMCFSIDSPDLENI                    | 14576104 | 7.6   | RSV      |
| >AVP1925 | CSIELSDIPLSVDFTMID                    | 14576104 | 50    | RSV      |
| >AVP1926 | ADVILMCFSIDSPDLENI                    | 14576104 | 2.56  | RSV      |
| >AVP1927 | TAVILMCFSIDSPDLENI                    | 14576104 | 1.37  | RSV      |
| >AVP1928 | TDAILMCFSIDSPDLENI                    | 14576104 | 6.6   | RSV      |
| >AVP1929 | TDVALMCFSIDSPDLENI                    | 14576104 | 11.6  | RSV      |
| >AVP1930 | TDVIAMCFSIDSPDLENI                    | 14576104 | 5.42  | RSV      |
| >AVP1931 | TDVILACFSIDSPDLENI                    | 14576104 | 1.43  | RSV      |
| >AVP1932 | TDVILMAFSIDSPDLENI                    | 14576104 | 50    | RSV      |
| >AVP1933 | TDVILMCASIDSPDLENI                    | 14576104 | 6.29  | RSV      |
| >AVP1934 | TDVILMCFASIDSPDLENI                   | 14576104 | 6.82  | RSV      |
| >AVP1935 | TDVILMCFASIDSPDLENI                   | 14576104 | 3.52  | RSV      |

|          |                       |          |        |     |
|----------|-----------------------|----------|--------|-----|
| >AVP1936 | TDVILMCFSIASPDSLENI   | 14576104 | 4.36   | RSV |
| >AVP1937 | TDVILMCFSIDAPDSLENI   | 14576104 | 2.26   | RSV |
| >AVP1938 | TDVILMCFSIDSADSLENI   | 14576104 | 15.32  | RSV |
| >AVP1939 | TDVILMCFSIDSPASLENI   | 14576104 | 2.61   | RSV |
| >AVP1941 | TDVILMCFSIDSPDSAENI   | 14576104 | 2.27   | RSV |
| >AVP1942 | TDVILMCFSIDSPDSLANI   | 14576104 | 9.83   | RSV |
| >AVP1943 | TDVILMCFSIDSPDSLEAI   | 14576104 | 18.47  | RSV |
| >AVP1944 | TDVILMCFSIDSPDSLENA   | 14576104 | 4.89   | RSV |
| >AVP1945 | TDVILMCFSI            | 14576104 | 50     | RSV |
| >AVP1946 | TDVILMCFSIDSP         | 14576104 | 50     | RSV |
| >AVP1948 | DVILMCFSIDSPDSLENI    | 14576104 | 1.23   | RSV |
| >AVP1949 | VILMCFSIDSPDSLENI     | 14576104 | 16.95  | RSV |
| >AVP1950 | ILMCFSIDSPDSLENI      | 14576104 | 7.17   | RSV |
| >AVP1951 | CFSIDSPDSLENI         | 14576104 | 50     | RSV |
| >AVP1953 | ILMCFSIDSPDSLE        | 14576104 | 3.5    | RSV |
| >AVP1954 | ILMCFSIDSPDSL         | 14576104 | 12.4   | RSV |
| >AVP1955 | ILMCFSIDSPDS          | 14576104 | 6.36   | RSV |
| >AVP1956 | ILMCFSIDSPD           | 14576104 | 4.61   | RSV |
| >AVP1957 | ILMCFSIDSP            | 14576104 | 35.77  | RSV |
| >AVP1958 | ILMCFSIDS             | 14576104 | 50     | RSV |
| >AVP1959 | ILMCFSID              | 14576104 | 50     | RSV |
| >AVP1973 | QLQKWEDWVRWIGNIPQYLKG | 12610147 | 0.013  | FIV |
| >AVP1974 | QKWEDWVRWIGN          | 12610147 | 0.178  | FIV |
| >AVP1975 | WEDWVRWIGNIP          | 12610147 | 0.03   | FIV |
| >AVP1976 | QLQKWEDWVRWI          | 12610147 | 0.02   | FIV |
| >AVP1977 | WEDWVRWI              | 12610147 | 0.057  | FIV |
| >AVP1983 | AEDWVRWI              | 12610147 | 4.623  | FIV |
| >AVP1984 | WADWVRWI              | 12610147 | 0.162  | FIV |
| >AVP1985 | WEAWVRWI              | 12610147 | 0.1    | FIV |
| >AVP1986 | WEDAVRWI              | 12610147 | 53.753 | FIV |



|          |                                      |          |        |       |
|----------|--------------------------------------|----------|--------|-------|
| >AVP1987 | WEDWARWI                             | 12610147 | 0.069  | FIV   |
| >AVP1989 | WEDWVRAI                             | 12610147 | 53.753 | FIV   |
| >AVP1990 | WEDWVRWA                             | 12610147 | 0.15   | FIV   |
| >AVP1993 | PPATHIADRNHTPFSDV                    | 11932408 | 0.33   | MV    |
| >AVP1994 | ATHTICDRNHTW                         | 11932408 | 60     | MV    |
| >AVP2001 | FHFEVFNVPSCSICSNPTCWAICKRIPNKKPGKK   | 11487583 | 80     | RSV   |
| >AVP2002 | VPCSICSNPTCWAICKRIPNKKPGKK           | 11487583 | 165    | RSV   |
| >AVP2003 | CSICSNPTCWAICKRIPNKKPGKK             | 11487583 | 177    | RSV   |
| >AVP2005 | KPPSKPNNDHFHFEVFNVPSCSICSNPTCWAICKRI | 11487583 | 12     | RSV   |
| >AVP2006 | KPNNDHFHFEVFNVPSCSICSNPTCWAICKRI     | 11487583 | 25     | RSV   |
| >AVP2007 | KQRQNKPPSKPNNDHFHFEVFN               | 11487583 | 190    | RSV   |
| >AVP2008 | KQRQNKPPSKPNNDHFH                    | 11487583 | 240    | RSV   |
| >AVP2009 | KPPSKPNNDHFHFEVFNVP                  | 11487583 | 220    | RSV   |
| >AVP2011 | KPPSKPNNDHFHFEVFN                    | 11487583 | 7      | RSV   |
| >AVP2020 | NILRLKESITATIEAVHEVTDGLS             | 10364347 | 2      | NDV   |
| >AVP2021 | SMEKLAGFGAVGAGATAEETRRMLHRAFDTLA     | 10220447 | 15     | HSV 1 |
| >AVP2023 | ALDKLEESNSKLDKVNKLT                  | 9527912  | 2      | NDV   |
| >AVP2024 | ALDKAEESNSKLDKVNKLT                  | 9527912  | 6      | NDV   |
| >AVP2025 | ALDKAEESNSKADKVNKLT                  | 9527912  | 35     | NDV   |
| >AVP2032 | YGAVVNDL                             | 3012359  | 29.749 | HSV 1 |
| >AVP2033 | YAGAVVNDL                            | 3012359  | 5.929  | HSV 1 |
| >AVP2034 | YAGAVVNDLL                           | 3012360  | 22     | HSV 1 |
| >AVP2039 | FLQDSKAELEKARKILSEVG                 | 12586338 | 17     | SeV   |
| >AVP2040 | KAACKAAKAAKAAKWAKKAA                 | 15498607 | 117    | HSV 1 |
| >AVP2041 | AKKAAKKAKKAAKKAKKAAKK                | 15498607 | 41     | HSV 1 |
| >AVP2042 | AKKAAKKAKKAAKKAKKWAKK                | 15498607 | 47.3   | HSV 1 |
| >AVP2044 | ARRAWRRARRAARRARRAARR                | 15498607 | 18.2   | HSV 1 |
| >AVP2045 | ARRAKRRARRAARRARRKARR                | 15498607 | 13     | HSV 1 |
| >AVP2046 | ARRAKRRARRAKRRARRKKRR                | 15498607 | 24.6   | HSV 1 |
| >AVP2047 | IFKAIWSGKSLF                         | 20950663 | 5      | HCV   |

|          |                                    |          |       |        |
|----------|------------------------------------|----------|-------|--------|
| >AVP2057 | LFGLIPSLIGGLVSAFK                  | 21620914 | 1.03  | INFV A |
| >HIP1013 | DWLKAFYDKVAEKLKEAF                 | 2170446  | 20    | HIV    |
| >HIP1014 | KWLDAFYKDVAKELEKAF                 | 2170446  | 100   | HIV    |
| >HIP1015 | KAFEEVLAKKFYDKALWD                 | 2170446  | 100   | HIV    |
| >HIP1113 | DQAEHLKTAVQMAVFIHNYKA              | 22742518 | 0.085 | HIV    |
| >HIP1114 | WIHAEIKNSLKIDNLDVNRCEALD           | 19801648 | 2.02  | HIV    |
| >HIP1115 | WNSLKIDNLDV                        | 19801648 | 11.9  | HIV    |
| >HIP1125 | AVGIGAMFLGFLGAAGSTMGAAS            | 22520838 | 0.023 | HIV    |
| >HIP1126 | IRKAHCNISRAKWND                    | 21264298 | 0.05  | HIV    |
| >HIP1127 | IRKAHCNISRADWND                    | 21264298 | 0.05  | HIV    |
| >HIP1129 | RQLLSGIVQQNNLLRAIEAQHLLQK          | 20605950 | 0.338 | HIV    |
| >HIP1133 | QETAYFLLKLAGRWP                    | 12643937 | 3.5   | HIV    |
| >HIP1135 | AGERIVDIIATDIQ                     | 12643937 | 2     | HIV    |
| >HIP1137 | AGERIVDIIA                         | 12643937 | 30    | HIV    |
| >HIP1138 | ATGQETAYFLLKLAGKA                  | 11705373 | 250   | HIV    |
| >HIP1140 | PDIVIYQYMDDL YVGSdleI              | 16879966 | 6     | HIV    |
| >HIP1142 | ETWETWWTEYWQATWIPEWE               | 16879966 | 6     | HIV    |
| >HIP1143 | LQDSGLEVNIVTDSQYALGI               | 16879966 | 11    | HIV    |
| >HIP1146 | WQCLTLTHRGFVLLTITVLR               | 18201721 | 12    | HIV    |
| >HIP1147 | ILPWKWPWWPWP                       | 15482931 | 16    | HIV    |
| >HIP1148 | RSQKEGLHYTCSSHPYSQYQFWK            | 22403408 | 136   | HIV    |
| >HIP1149 | CSSHPYSQYQFWK                      | 22403408 | 28    | HIV    |
| >HIP1150 | QKEGLHYTCSSHPYSQYQF                | 22403408 | 237   | HIV    |
| >HIP1151 | SGIVQQNNLLRAIEAQHLLQLTVWGIKQLQARIL | 22235115 | 7     | HIV    |
| >HIP1156 | NKPFVFLM                           | 22406118 | 100   | HIV    |
| >HIP1162 | RINNIPWSEAMM                       | 14967033 | 1.6   | HIV    |
| >HIP1164 | YGGIKKEIEAIKKEQEAIKKKIEAIEKEIEA    | 11572974 | 0.026 | HIV    |
| >HIP1167 | TRQARRNRRRWREQR                    | 20580677 | 1.7   | HIV    |
| >HIP1168 | TRQARRNRRRWREQRAAAAC               | 20580677 | 0.35  | HIV    |
| >HIP1170 | IYWNVSGW                           | 19053244 | 7     | HIV    |

|          |                                       |          |        |     |
|----------|---------------------------------------|----------|--------|-----|
| >HIP1171 | FWNWLSAWIKKTYEEIKKTYEEIKKTYEEIERDWEMV | 18662985 | 0.58   | HIV |
| >HIP1173 | IKKTYEEIKKTYEEIKKTYEEIKKTYEEIKKTYEE   | 18662985 | 200    | HIV |
| >HIP1174 | IKKTYEEIKKTYEEIKKTYEEIKKTYEEIERDWEMV  | 18662985 | 117    | HIV |
| >HIP1175 | ITFEDLLDYYGP                          | 18374356 | 4      | HIV |
| >HIP138  | YQLLRMI                               | 12054767 | 120    | HIV |
| >HIP140  | AAAMSQVTN                             | 15113844 | 100    | HIV |
| >HIP144  | AEAMSQVTN                             | 15113844 | 5      | HIV |
| >HIP148  | YQLLRMIY                              | 12054767 | 5      | HIV |
| >HIP154  | LFYLVPGPGH                            | 12054767 | 200    | HIV |
| >HIP157  | AAWWAGIKQEF                           | 16854053 | 277    | HIV |
| >HIP158  | ACAWAGIKQEF                           | 16854053 | 33     | HIV |
| >HIP159  | ACGWAGIKQEF                           | 16854053 | 46     | HIV |
| >HIP160  | ACWAAGIKQEF                           | 16854053 | 333    | HIV |
| >HIP161  | ACWGAGIKQEF                           | 16854053 | 333    | HIV |
| >HIP162  | ACWWAAIKQEF                           | 16854053 | 90     | HIV |
| >HIP164  | ACWWAGIAQEF                           | 16854053 | 62     | HIV |
| >HIP165  | ACWWAGIKAEF                           | 16854053 | 333    | HIV |
| >HIP166  | ACWWAGIKQAF                           | 16854053 | 333    | HIV |
| >HIP167  | ACWWAGIKQEA                           | 16854053 | 245    | HIV |
| >HIP171  | ACWWAGIRQEF                           | 16854053 | 333    | HIV |
| >HIP173  | AEPERRNIKYL                           | 12054767 | 50     | HIV |
| >HIP179  | AAFYLLKLAGRW                          | 16854053 | 100    | HIV |
| >HIP185  | KRIVQRIKDFLR                          | 18591279 | 63.5   | HIV |
| >HIP189  | RPRLSHKGMPF                           | 10802050 | 52.209 | HIV |
| >HIP197  | TAAFLKLAGRW                           | 16854053 | 193    | HIV |
| >HIP198  | TASFLKLAGRW                           | 16854053 | 186    | HIV |
| >HIP199  | TAYALLKLAGRW                          | 16854053 | 333    | HIV |
| >HIP200  | TAYFALKLAGRW                          | 16854053 | 115    | HIV |
| >HIP201  | TAYFLAKLAGRW                          | 16854053 | 333    | HIV |
| >HIP202  | TAYFLLALAGR                           | 16854053 | 113    | HIV |

|         |               |          |        |     |
|---------|---------------|----------|--------|-----|
| >HIP203 | TAYFLLILAGRW  | 16854053 | 4.1    | HIV |
| >HIP204 | TAYFLLKAAGRW  | 16854053 | 333    | HIV |
| >HIP205 | TAYFLLKLAARW  | 16854053 | 118    | HIV |
| >HIP207 | TAYFLLKLAGRA  | 16854053 | 333    | HIV |
| >HIP208 | TAYFLLKLAGRL  | 16854053 | 315    | HIV |
| >HIP209 | TAYFLLKLAGRW  | 16854053 | 21     | HIV |
| >HIP218 | YALLIRMIYKNI  | 12054767 | 8      | HIV |
| >HIP221 | YQALIRMIYKNI  | 12054767 | 165    | HIV |
| >HIP222 | YQLAIRMIYKNI  | 12054767 | 14     | HIV |
| >HIP223 | YQLLARMYKNI   | 12054767 | 45     | HIV |
| >HIP224 | YQLLIAMIYKNI  | 12054767 | 34     | HIV |
| >HIP225 | YQLLIRAIYKNI  | 12054767 | 70     | HIV |
| >HIP226 | YQLLIRMAYKNI  | 12054767 | 35     | HIV |
| >HIP227 | YQLLIRMIYKNI  | 12054767 | 40     | HIV |
| >HIP228 | YQLLIRMIYANI  | 12054767 | 11     | HIV |
| >HIP230 | YQLLIRMIYKNA  | 12054767 | 11     | HIV |
| >HIP231 | YQLLIRMIYKNI  | 12054767 | 5      | HIV |
| >HIP232 | YQLLIRPIYKNI  | 12054767 | 200    | HIV |
| >HIP233 | AEASQVTNTATIM | 15113844 | 126    | HIV |
| >HIP235 | FKRIVQRIKDFLR | 18591279 | 3.4    | HIV |
| >HIP236 | GFLDIIEKIAKSW | 20086159 | 10.5   | HIV |
| >HIP237 | GIFDKLAKEISIW | 20086159 | 65.8   | HIV |
| >HIP238 | GIIDIAKKLFESW | 20086159 | 20.1   | HIV |
| >HIP239 | GIWSDLAIEIKKF | 20086159 | 11.4   | HIV |
| >HIP240 | GLFDIHKIAESW  | 20086159 | 11.7   | HIV |
| >HIP241 | GLWEKIDKFASII | 20086159 | 65.8   | HIV |
| >HIP244 | GWFDIHKIASEL  | 20086159 | 10.7   | HIV |
| >HIP245 | GWLKIESIIDAF  | 20086159 | 29.5   | HIV |
| >HIP260 | QRRLSHKGMPF   | 10802050 | 19.745 | HIV |
| >HIP263 | RLFDKIRQVIRKF | 18591279 | 58.1   | HIV |

|         |                      |          |      |     |
|---------|----------------------|----------|------|-----|
| >HIP264 | AEAASQVTNTATIM       | 15113844 | 142  | HIV |
| >HIP265 | AEAMSQVANTATIM       | 15113844 | 110  | HIV |
| >HIP266 | AEAMSQVTNTATIM       | 15113844 | 10   | HIV |
| >HIP268 | FLFPLITSFLSKVL       | 20086159 | 16.7 | HIV |
| >HIP269 | FRPALIVRTKGTRL       | 20086159 | 61.4 | HIV |
| >HIP270 | INLKAIAALAKKLL       | 20086159 | 67.6 | HIV |
| >HIP271 | NQIIEQLIKKEKVY       | 15790559 | 240  | HIV |
| >HIP288 | ESELVSQIIEQLIKK      | 15790559 | 120  | HIV |
| >HIP292 | FIHFRIGCQHSRIGI      | 17490682 | 200  | HIV |
| >HIP297 | GRFKRFRKKFKKLFK      | 18591279 | 49.6 | HIV |
| >HIP300 | HFPRIWLHSLGQHIY      | 17490682 | 187  | HIV |
| >HIP344 | QQLLFIHFRIGCQHS      | 17490682 | 33   | HIV |
| >HIP361 | TWAGVEAIRILQQL       | 17490682 | 0.88 | HIV |
| >HIP363 | TYGDTWAGVEAIRI       | 17490682 | 150  | HIV |
| >HIP365 | VDKPDYRPRPRPPNM      | 20086159 | 54.4 | HIV |
| >HIP367 | VEAIRILQQLLFIH       | 17490682 | 0.22 | HIV |
| >HIP388 | GFKRIVQRIKDFLRNLV    | 18591279 | 0.98 | HIV |
| >HIP450 | GNNRPVYIPQPRPPHRI    | 20086159 | 47.4 | HIV |
| >HIP452 | GRFKRFRKKFKKLFKKIS   | 18591279 | 0.35 | HIV |
| >HIP453 | GRFKRFRKPFKKLFKKIS   | 18591279 | 3.2  | HIV |
| >HIP549 | GKPRPYSRPTSHRPIRV    | 20086159 | 45.5 | HIV |
| >HIP550 | GLKLLGKLLKLLGKLLK    | 20086159 | 47.5 | HIV |
| >HIP551 | GLRLLGRLLRLLRLLR     | 20086159 | 4.4  | HIV |
| >HIP552 | IKKEKVYLAWVPAHKGIGN  | 15790559 | 120  | HIV |
| >HIP553 | KGRGKQGGKVRAKATRSS   | 20086159 | 50   | HIV |
| >HIP557 | AEAIPMSIPPEVKFNKPFVF | 17448989 | 100  | HIV |
| >HIP581 | ELVNQIIEQLIKKEKVYLAW | 15790559 | 6.9  | HIV |
| >HIP594 | GIKEFKREFQRIKDFLRNLV | 18591279 | 1.6  | HIV |
| >HIP595 | GIKEFKRIVQRIKDFLRNLV | 18591279 | 1.08 | HIV |
| >HIP596 | GIKEWKRIVQRIKDFLRNLV | 18591279 | 7.4  | HIV |

|         |                      |          |       |     |
|---------|----------------------|----------|-------|-----|
| >HIP597 | GIKQFKRIVQRIKDFLRNLV | 18591279 | 0.91  | HIV |
| >HIP610 | IQAQPDQSESELVNQIEQL  | 15790559 | 120   | HIV |
| >HIP620 | KILEPFRKQNPDIYQYMD   | 15790559 | 4.8   | HIV |
| >HIP625 | KRIVQRIKDFLRNLVPRTES | 18591279 | 40.5  | HIV |
| >HIP630 | LAAIPMSIPPEVKFNKPFVF | 17448989 | 100   | HIV |
| >HIP633 | LEAIPMSIPPEVKFNKPFVF | 17448989 | 23.5  | HIV |
| >HIP634 | LEAIPASIPPEVKFNKPFVF | 17448989 | 13    | HIV |
| >HIP635 | LEAIPCSIPPCFAFNKPFVF | 17448989 | 0.27  | HIV |
| >HIP637 | LEAIPCSIPPCFLFGKPFVF | 17448989 | 0.39  | HIV |
| >HIP638 | LEAIPCSIPPCVAFNKPFVF | 17448989 | 0.18  | HIV |
| >HIP639 | LEAIPCSIPPCVFFGKPFVF | 17448989 | 0.28  | HIV |
| >HIP640 | LEAIPCSIPPCVFFNKPFVF | 17448989 | 0.93  | HIV |
| >HIP646 | LEAIPMCIPPECAFNKPFVF | 17448989 | 1     | HIV |
| >HIP647 | LEAIPMSAPPEVKFNKPFVF | 17448989 | 23.46 | HIV |
| >HIP648 | LEAIPMSIAPEVKFNKPFVF | 17448989 | 16.33 | HIV |
| >HIP650 | LEAIPMSIPPAVKFNKPFVF | 17448989 | 11    | HIV |
| >HIP651 | LEAIPMSIPPEAKFNKPFVF | 17448989 | 10.64 | HIV |
| >HIP652 | LEAIPMSIPPEFLFGKPFVF | 17448989 | 1.34  | HIV |
| >HIP654 | LEAIPMSIPPEVAFKPFVF  | 17448989 | 3.45  | HIV |
| >HIP655 | LEAIPMSIPPEVAFNKPFVF | 17448989 | 4.73  | HIV |
| >HIP656 | LEAIPMSIPPEVFFNKPFVF | 17448989 | 0.66  | HIV |
| >HIP657 | LEAIPMSIPPEVKANKPFVF | 17448989 | 4.62  | HIV |
| >HIP658 | LEAIPMSIPPEVKFAKPFVF | 17448989 | 17.41 | HIV |
| >HIP659 | LEAIPMSIPPEVKFNAPFVF | 17448989 | 10.81 | HIV |
| >HIP660 | LEAIPMSIPPEVKFNKAFVF | 17448989 | 12.72 | HIV |
| >HIP661 | LEAIPMSIPPEVKFNKPAVF | 17448989 | 100   | HIV |
| >HIP662 | LEAIPMSIPPEVKFNKPAFV | 17448989 | 100   | HIV |
| >HIP663 | LEAIPMSIPPEVKFNKPFVA | 17448989 | 100   | HIV |
| >HIP664 | LEAIPMSIPPEVKFNKPFVF | 17448989 | 14.79 | HIV |
| >HIP700 | SPAIFQSSMTKILEPFRKQN | 15790559 | 35    | HIV |

|         |                                   |           |        |     |
|---------|-----------------------------------|-----------|--------|-----|
| >HIP703 | SWKSMAKKLKEYMEKLRQRA              | 20086159  | 32.7   | HIV |
| >HIP736 | ILGPVLGLVSDTLDDVVGIL              | 20086159  | 49.4   | HIV |
| >HIP737 | ILGPVLGLVSRTLRRVVGIL              | 20086159  | 2.2    | HIV |
| >HIP740 | RQRVEELSKFSKKGAAARRRK             | 20086159  | 40     | HIV |
| >HIP741 | SKEKIGKEFKRIVQRIKDFLR             | 18591279  | 10.8   | HIV |
| >HIP742 | TRSSRAGLQFPVGRVHRLLRK             | 20086159  | 41.1   | HIV |
| >HIP743 | FFHHIFRGIVHVGGKTIHRLVTG           | 20086159  | 2.1    | HIV |
| >HIP746 | LLGDLLRKSKEKIGKEFKRIVQR           | 18591279  | 35.4   | HIV |
| >HIP748 | RPKHPKHQGLPQEVLNENLLRF            | 20086159  | 36.2   | HIV |
| >HIP749 | VFQFLGRIHHVGNFVHGFSHVF            | 20086159  | 7.1    | HIV |
| >HIP750 | GLNTLKKVFQGLHEAIKLNNHVQ           | 20086159  | 35.7   | HIV |
| >HIP751 | GLRSKIWLWVLLMIWQESNKFKKM          | 20086159  | 31.6   | HIV |
| >HIP752 | GLRSRIWLWVLLMIWQESNRFKRM          | 20086159  | 1.25   | HIV |
| >HIP755 | GAWKNFWSSLRKGFDGEAGRAIRR          | 20086159  | 34.1   | HIV |
| >HIP756 | HVDKKVADKVLLKQLRIMRLTRL           | 20086159  | 3.05   | HIV |
| >HIP757 | IWLTALKFLGKHAAKHLAKQQLSKL         | 20086159  | 35.2   | HIV |
| >HIP758 | NLVSGLIEARKYLEQLHRKLNKRKV         | 20086159  | 33.3   | HIV |
| >HIP761 | INNYTSLIGSLIEESQNQEKNEQELLE       | US6861059 | 36.226 | HIV |
| >HIP762 | INNYTSLIHSLEESQNQEKNEQELLE        | US6861059 | 1.267  | HIV |
| >HIP763 | MTLTVQARQLLSQIVQQQNNLLRAIEAQ      | US6861059 | 0.028  | HIV |
| >HIP764 | QARQLLSQIVQQQNNLLRAIEAQHLLQ       | US6861059 | 0.03   | HIV |
| >HIP765 | QHLLQLTVWGIKQLQARILAVERYLKDQ      | US6861059 | 0.035  | HIV |
| >HIP766 | RQLLSQIVQQQNNLLRAIEAQHLLQLT       | US6861059 | 0.016  | HIV |
| >HIP767 | VQQQNNLLRAIEAQHLLQLTVWGIKQL       | US6861059 | 0.036  | HIV |
| >HIP768 | VWGIKQLQARILAVERYLKDQQLGIWG       | US6861059 | 0.02   | HIV |
| >HIP770 | RMIYKNILFYLVPGPGHGAEPERRNIKYL     | 12054767  | 85     | HIV |
| >HIP776 | LSELDDRADALQAGASQFETSAAKLRKYWWKN  | 12054767  | 200    | HIV |
| >HIP777 | QLLIRMIYKNILFYLVPGPGHGAEPERRNIKYL | 12054767  | 9      | HIV |
| >HIP782 | WMEWDREINNYTSLIHSLEEAQNQEKNEQELL  | 19073606  | 0.002  | HIV |
| >HIP783 | WMEWDREINNYTSLIHSLEELQNQEKNEQELL  | 19073606  | 0.002  | HIV |

|         |                                      |           |       |     |
|---------|--------------------------------------|-----------|-------|-----|
| >HIP784 | WMEWDREINNYTSLIHSLEIEPQNQQEKNEQELL   | 19073606  | 0.046 | HIV |
| >HIP785 | WMEWDREINNYTSLIHSLEIETQNQQEKNEQELL   | 19073606  | 0.003 | HIV |
| >HIP786 | WMEWDREINNYTSLIHSLEIEWQNQQEKNEQELL   | 19073606  | 1     | HIV |
| >HIP793 | INNYTSLIHSLEESQNQQEKNEQELLELDKWASL   | US6861059 | 0.065 | HIV |
| >HIP804 | DREINNYTSLIHSLEESQNQQEKNEQELLELDKWA  | US6861059 | 0.023 | HIV |
| >HIP808 | EESQNQQEKNEQELLELDKWASLWNWFNITNWLWI  | US6861059 | 0.255 | HIV |
| >HIP812 | ESQNQQEKNEQELLELDKWASLWNWFNITNWLWLIK | US6861059 | 0.255 | HIV |
| >HIP813 | EWDREINNYTSLIHSLEESQNQQEKNEQELLELDK  | US6861059 | 0.012 | HIV |
| >HIP814 | HSLIEESQNQQEKNEQELLELDKWASLWNWFNITNW | US6861059 | 0.036 | HIV |
| >HIP816 | IEESQNQQEKNEQELLELDKWASLWNWFNITNWLWL | US6861059 | 25.91 | HIV |
| >HIP817 | IHSLEESQNQQEKNEQELLELDKWASLWNWFNITN  | US6861059 | 0.029 | HIV |
| >HIP818 | INNYTSLIHSLEESQNQQEKNEQELLELDKWASLW  | US6861059 | 0.392 | HIV |
| >HIP819 | IWNNMTWMEWDREINNYTSLIHSLEESQNQQEKNE  | US6861059 | 0.593 | HIV |
| >HIP820 | KSLEQIWNMTWMEWDREINNYTSLIHSLEESQNQ   | US6861059 | 0.067 | HIV |
| >HIP821 | LEQIWNMTWMEWDREINNYTSLIHSLEESQNQQE   | US6861059 | 0.049 | HIV |
| >HIP822 | LIEESQNQQEKNEQELLELDKWASLWNWFNITNWLW | US6861059 | 0.047 | HIV |
| >HIP823 | LIHSLEESQNQQEKNEQELLELDKWASLWNWFNIT  | US6861059 | 0.003 | HIV |
| >HIP824 | LVQPRGPRSGPGPWQGRRKFRQRPRLSHGKMPMF   | 10802050  | 0.085 | HIV |
| >HIP825 | MEWDREINNYTSLIHSLEESQNQQEKNEQELLELD  | US6861059 | 0.01  | HIV |
| >HIP827 | MTWMEWDREINNYTSLIHSLEESQNQQEKNEQELL  | 17640899  | 0.009 | HIV |
| >HIP828 | NKSLEQIWNMTWMEWDREINNYTSLIHSLEESQN   | US6861059 | 0.078 | HIV |
| >HIP829 | NMTWMEWDREINNYTSLIHSLEESQNQQEKNEQEL  | US6861059 | 0.001 | HIV |
| >HIP830 | NNMTWMEWDREINNYTSLIHSLEESQNQQEKNEQE  | US6861059 | 0.016 | HIV |
| >HIP831 | NNYTSLIHSLEESQNQQEKNEQELLELDKWASLWN  | US6861059 | 0.027 | HIV |
| >HIP832 | NQQEKNEQELLELDKWASLWNWFNITNWLWLIKIFI | US6861059 | 0.253 | HIV |
| >HIP833 | NYTSLIHSLEESQNQQEKNEQELLELDKWASLWNW  | US6861059 | 0.004 | HIV |
| >HIP834 | QIWNMTWMEWDREINNYTSLIHSLEESQNQQEKN   | US6861059 | 0.001 | HIV |
| >HIP835 | QNQQEKNEQELLELDKWASLWNWFNITNWLWLIKIF | US6861059 | 0.252 | HIV |
| >HIP836 | REINNYTSLIHSLEESQNQQEKNEQELLELDKWAS  | US6861059 | 1.347 | HIV |
| >HIP838 | SLEQIWNMTWMEWDREINNYTSLIHSLEESQNQQ   | US6861059 | 0.597 | HIV |



|         |                                        |           |       |     |
|---------|----------------------------------------|-----------|-------|-----|
| >HIP839 | SLIEESQNQQEKNEQELLELDKWASLWNWFNITNWL   | US6861059 | 0.145 | HIV |
| >HIP840 | SLIHSLIEESQNQQEKNEQELLELDKWASLWNWFNI   | US6861059 | 0.001 | HIV |
| >HIP841 | SNQQEKNEQELLELDKWASLWNWFNITNWLWLIKI    | US6861059 | 0.256 | HIV |
| >HIP844 | TWMEWDREINNYTSLIHSLIEESQNQQEKNEQELLE   | US6861059 | 0.011 | HIV |
| >HIP845 | WDREINNYTSLIHSLIEESQNQQEKNEQELLELDKW   | US6861059 | 0.022 | HIV |
| >HIP850 | WMEWDREINNYTSLIHSLIEESQNQQEKNEQELLE    | US6861059 | 0.002 | HIV |
| >HIP854 | YTSLIHSLIEEDQNQQEKNEQELLELDKWASLWNWF   | 19073606  | 0.21  | HIV |
| >HIP855 | YTSLIHSLIEEQNQQEKNEQELLELDKWASLWNWF    | 19073606  | 0.283 | HIV |
| >HIP856 | YTSLIHSLIEEFQNQQEKNEQELLELDKWASLWNWF   | 19073606  | 0.009 | HIV |
| >HIP857 | YTSLIHSLIEEGQNQQEKNEQELLELDKWASLWNWF   | 19073606  | 0.001 | HIV |
| >HIP858 | YTSLIHSLIEEHQNQQEKNEQELLELDKWASLWNWF   | 19073606  | 0.21  | HIV |
| >HIP860 | YTSLIHSLIEEKQNQQEKNEQELLELDKWASLWNWF   | 19073606  | 0.708 | HIV |
| >HIP863 | YTSLIHSLIEENQNQQEKNEQELLELDKWASLWNWF   | 19073606  | 0.019 | HIV |
| >HIP864 | YTSLIHSLIEEPQNQQEKNEQELLELDKWASLWNWF   | 19073606  | 0.446 | HIV |
| >HIP865 | YTSLIHSLIEEQNQQEKNEQELLELDKWASLWNWF    | 19073606  | 0.034 | HIV |
| >HIP866 | YTSLIHSLIEERQNQQEKNEQELLELDKWASLWNWF   | 19073606  | 0.362 | HIV |
| >HIP868 | YTSLIHSLIEESQNQQEKLEQELLELDKWASLWNWF   | US6861059 | 0.009 | HIV |
| >HIP870 | YTSLIHSLIEESQNQQEKNEQELLELDKPAASLWNWF  | US6861059 | 0.137 | HIV |
| >HIP871 | YTSLIHSLIEESQNQQEKNEQELLELDKWASLANAA   | US6861059 | 28.6  | HIV |
| >HIP874 | YTSLIHSLIEESQNQQEKNEQELLELDKWASLWNAF   | US6861059 | 0.012 | HIV |
| >HIP875 | YTSLIHSLIEESQNQQEKNEQELLELDKWASLWNSF   | US6861059 | 0.018 | HIV |
| >HIP880 | YTSLIHSLIEESQNQQEKNEQELLELDKWASPWVWVWF | US6861059 | 0.004 | HIV |
| >HIP881 | YTSLIHSLIEESQNQQEKNEQELLELNKASLWNWF    | US6861059 | 0.007 | HIV |
| >HIP882 | YTSLIHSLIEESQNQQEKNEQELLQLDKWASLWNWF   | US6861059 | 0.003 | HIV |
| >HIP885 | YTSLIHSLIEESQNQQEKNEQELLQLDKWASLWNWF   | US6861059 | 0.015 | HIV |
| >HIP889 | YTSLIHSLIEEWQNQQEKNEQELLELDKWASLWNWF   | 19073606  | 0.029 | HIV |
| >HIP890 | YTSLIHSLIEEYQNQQEKNEQELLELDKWASLWNWF   | 19073606  | 0.025 | HIV |
| >HIP891 | YTSLIHSLIEQSNQQEKNEQELLELDKWASLWNWF    | US6861059 | 0.005 | HIV |
| >HIP892 | YTSLIHSLIQESQNQQEKNEQELLELDKWASLWNWF   | US6861059 | 0.006 | HIV |
| >HIP893 | YTSLIHSLIQSSQNQQKQKQQLQLDKWASLWNWF     | US6861059 | 0.263 | HIV |

|         |                                         |           |       |     |
|---------|-----------------------------------------|-----------|-------|-----|
| >HIP895 | YTSLIQSLIEESQNQQEKNEQQLLELDKWASLWNWF    | US6861059 | 0.001 | HIV |
| >HIP899 | LLGDLLRKSKEKIGKEFKRIVQRIKDFLRNLVPRTES   | 18591279  | 1.6   | HIV |
| >HIP904 | MTWEAWDRAIAEYAAARIEALIRAAQEQQEKNEAALREL | 17640899  | 0.007 | HIV |
| >HIP905 | MTWMAWDRAIANYAALIHALIEAAQNQQEKNEAALLEL  | 17640899  | 0.022 | HIV |
| >HIP906 | MTWMEWDREINNYTSLIHSLIEESQNQQEKNEQELLEL  | 17640899  | 0.008 | HIV |
| >HIP909 | TTWEAWDRAIAEYAAARIEALIRAAQELQEKLAAALREL | 17640899  | 0.161 | HIV |
| >HIP910 | TTWEAWDRAIAEYAAARIEALIRAAQELQEKNAAALREL | 17640899  | 0.006 | HIV |
| >HIP912 | TTWEAWDRAIAEYAAARIEALIRAAQEQQEKLEAALREL | 17640899  | 0.012 | HIV |
| >HIP913 | TTWEAWDRAIAEYAAARIEALIRAAQEQQEKLEAVLREL | 17640899  | 0.013 | HIV |
| >HIP915 | TTWEAWDRAIAEYAAARIEALIRAAQEQQEKNEAALREL | 17640899  | 0.005 | HIV |
| >HIP916 | TTWEAWDRAIAEYAAARIEALIRAAQEQQEKNEAILREL | 17640899  | 0.006 | HIV |
| >HIP917 | TTWEAWDRAIAEYAAARIEALIRALQELQEKLAILREL  | 17640899  | 5.263 | HIV |
| >HIP918 | TTWEAWDRAIAEYAAARIEALIRALQELQEKNAAALREL | 17640899  | 0.014 | HIV |
| >HIP919 | TTWEAWDRAIAEYAAARIEALIRALQELQEKNAILREL  | 17640899  | 0.031 | HIV |
| >HIP920 | TTWEAWDRAIAEYAAARIEALIRALQEQQEKNEAALREL | 17640899  | 0.009 | HIV |
| >HIP921 | TTWEAWDRAIAEYAAARIEALIRALQEQQEKNEAILREL | 17640899  | 0.011 | HIV |
| >HIP922 | TTWEAWDRAIAEYAAARIEALIRASQEQQEKNEAELREL | 17640899  | 0.003 | HIV |
| >HIP924 | TTWEEWDREINEYTSRIESLIRESEQQEKNEQELREL   | 17640899  | 0.005 | HIV |
| >HIP945 | WEEWDKIEEYTKKIEELIKKSEEQQKN             | 19114674  | 0.002 | HIV |
| >HIP947 | GCKKYRRFRWKFKGKFWFWG                    | 22457281  | 2.9   | HIV |
| >HIP948 | GCKKYRRFRWKFKGKFWFWG                    | 22457281  | 8     | HIV |
| >HIP955 | APKEWMEWDREINNYTSLIHSLIKQGI             | 11118065  | 5.8   | HIV |
| >HIP956 | APKEWMAWAREIAAYAKLIAALI                 | 11118065  | 1.7   | HIV |
| >HIP957 | APKEWMAWAREIAAYAKLIAALIKQGI             | 11118065  | 1     | HIV |
| >HIP960 | GIGAVLKVLTTGLPALISWIKRKRQQ              | 9568968   | 1.2   | HIV |
| >HIP961 | KWKLFKKIEKVGQNIRDGIKAGPAVAVVGQATQIAK    | 9568968   | 2.5   | HIV |

**Table S2.** Validation dataset used in the development of AVP-IC<sub>50</sub>Pred prediction models.

| AVPdb/HIPdb_ID | Sequence                                 | Reference | IC50<br>(microM) | Virus  |
|----------------|------------------------------------------|-----------|------------------|--------|
| >AVP0001       | PYVGSGLYRR                               | 1331099   | 50               | AMV    |
| >AVP0002       | SMIENLEYM                                | 1383569   | 50               | LCMV   |
| >AVP0104       | LERLDVGTNLGNIAIAKLEDAKELLESSDQILRSMK     | 8700906   | 7.3              | MV     |
| >AVP0134       | LVFPSDEFDASISQVNEKINQSLAFIRKSDELLHN      | 8700906   | 9                | RSV    |
| >AVP0139       | DEFDASISQVNEKINQSLAFIRKSDELLHNVNAGK      | 8700906   | 12               | RSV    |
| >AVP0183       | FAVAVKAVAVKAVAVKAVKAVKKVKKAVKKAVKKK<br>K | 12208971  | 0.75             | FIV    |
| >AVP0190       | KKKKVFVKKVAKKVKVAKKVAKVAVAV              | 12208971  | 3                | FIV    |
| >AVP0193       | KRKRFAKKFLRFLRKVIRFLKRFIRRF              | 12208971  | 3.69             | FIV    |
| >AVP0425       | GIGKFLHSAKKFGKAFVGEIMNS                  | 15081088  | 22.16            | HSV 1  |
| >AVP0592       | SWRLDIWDWICESVLDFK                       | 18287023  | 30               | HCV    |
| >AVP0599       | KWLCRIWSWISDVLDFFE                       | 18287023  | 0.5              | HCV    |
| >AVP0601       | SWLRDVWDWICTVLTDFK                       | 18287023  | 3.9              | HCV    |
| >AVP0604       | SWLWEVWDWVLHVLSDFK                       | 18287023  | 7                | HCV    |
| >AVP0605       | TWLRAIWDWVCTALTDFK                       | 18287023  | 7.1              | HCV    |
| >AVP0607       | SWLRDVWDWVCTVLSDFK                       | 18287023  | 3.5              | HCV    |
| >AVP0611       | SWLDDIWDWICEVLSDFE                       | 18287023  | 4.7              | HCV    |
| >AVP0819       | CFLNITNSHVSILQEAPPLENRV                  | 19114713  | 1.55             | HTLV 1 |
| >AVP0977       | MDVNPTLLFLKVPQAIAISTTFPYT                | 19841738  | 0.002            | INFV A |
| >AVP0985       | MDVNPTLLFLKVPQAN                         | 19841738  | 0.046            | INFV A |
| >AVP0991       | MDVNPTLLFL                               | 19841738  | 3                | INFV A |
| >AVP1000       | MDVNPYFLFLKVPQA                          | 19841738  | 0.008            | INFV A |
| >AVP1173       | MANAGLQLLGIFLAFLGW                       | 22378192  | 2.1              | HCV    |
| >AVP1174       | GLQLLGIFLAFLGWIGAI                       | 22378192  | 25               | HCV    |

|          |                                       |           |         |          |
|----------|---------------------------------------|-----------|---------|----------|
| >AVP1179 | GAIVSTALPQWRIYSYAG                    | 22378192  | 23.8    | HCV      |
| >AVP1182 | MANAGLQLLGFILA                        | 22378192  | 25      | HCV      |
| >AVP1184 | MANAGLQLLGFILAFLGWIG                  | 22378192  | 17.8    | HCV      |
| >AVP1215 | GELGRPYYVLGDPGYAT                     | 22965230  | 0.228   | HCV      |
| >AVP1229 | CWVRLGRYLLRRLKTPFTRL                  | 23175359  | 12      | HCV      |
| >AVP1231 | DCWVRLGRYLLRRLKTPF                    | 23175359  | 12      | HCV      |
| >AVP1366 | DGSLGMRMGAA                           | US6544520 | 3       | HBV      |
| >AVP1481 | RDVSDFTDSVRDPKTSEILD                  | US7491489 | 258.344 | SARS-CoV |
| >AVP1486 | IQKEIDRLNEVAKNLNESLI                  | US7491489 | 37.128  | SARS-CoV |
| >AVP1510 | SWLRDIWDWLCELLSDFK                    | 21801309  | 0.82    | HCV      |
| >AVP1566 | SIELNKAKSLEESKEWIRRSNQKLSI            | 16973588  | 10      | HeV      |
| >AVP1734 | HRILMRIAQMMT                          | 22743126  | 60.608  | PRRSV    |
| >AVP1763 | SVVPSKATWGFA                          | 21176936  | 14.515  | TGEV     |
| >AVP1803 | VVTTRLFMSLVASVRNAFQSGYISFDEIHKTE      | 21518442  | 8       | MDV      |
| >AVP1806 | WLVEFVRRKK                            | 22258859  | 0.638   | INFV A   |
| >AVP1813 | FNVALDQVFESIENSQALVDQSNRILSSAEKGNTG   | 17967906  | 1.52    | hMPV     |
| >AVP1940 | TDVILMCFSIDSPDALENI                   | 14576104  | 1.19    | RSV      |
| >AVP1947 | TDVILMCFSIDSPDSL                      | 14576104  | 10.86   | RSV      |
| >AVP1988 | WEDWVAWI                              | 12610147  | 0.094   | FIV      |
| >AVP2010 | KPPSKPNDFHFVFNFV                      | 11487583  | 14      | RSV      |
| >AVP2036 | CNIAPASIVSRNIVYTRAQPNQDIA             | 9682337   | 88.299  | BRV      |
| >AVP2037 | ANVVATYPAHS                           | 10517309  | 5       | HSV 1    |
| >AVP2043 | AKKAWKKAKKAACKAKKWAKK                 | 15498607  | 40.8    | HSV 1    |
| >HIP1130 | SGIDQEQQNLTRLIEAQIHELQLTQWKIKQLLARILK | 19593361  | 0.488   | HIV      |
| >HIP1131 | SGIVQQLNNQLRAEEANQHLEQLSVWGSKQSQARRLK | 19593361  | 0.531   | HIV      |
| >HIP1134 | HLKTAVQMAVFIHNFKR                     | 12643937  | 3       | HIV      |
| >HIP1136 | QETAYFLKLAGR                          | 12643937  | 150     | HIV      |
| >HIP1139 | IHAEIKNSLKIDNLDVNRCEAL                | 18331842  | 25      | HIV      |
| >HIP1141 | KQLTEAVQKITTESIWIWVK                  | 16879966  | 7       | HIV      |

|          |                                      |           |       |     |
|----------|--------------------------------------|-----------|-------|-----|
| >HIP1163 | RMKQIEDKIEEIESKQKKIENEIARIKKLIGERY   | 11572974  | 25    | HIV |
| >HIP142  | AEAMAQVTN                            | 15113844  | 124   | HIV |
| >HIP163  | ACWWAGAKQEF                          | 16854053  | 333   | HIV |
| >HIP168  | ACWWAGIKQEF                          | 16854053  | 95    | HIV |
| >HIP174  | ASWWAGIKQEF                          | 16854053  | 294   | HIV |
| >HIP178  | QLLIRMIYKNI                          | 12054767  | 21    | HIV |
| >HIP206  | TAYFLKLAGAW                          | 16854053  | 83    | HIV |
| >HIP229  | YQLLIRMIYKAI                         | 12054767  | 7     | HIV |
| >HIP293  | FRKQNPDIVIYQYMD                      | 15790559  | 119   | HIV |
| >HIP307  | IRILQQLFIHFRIG                       | 17490682  | 0.7   | HIV |
| >HIP405  | KFRRQRPRLSHGKPMFP                    | 10802050  | 2.619 | HIV |
| >HIP454  | GRFKRIRKLLKLLFKKIS                   | 18591279  | 44    | HIV |
| >HIP628  | KVINPEPIVEPFMSKPFALF                 | 17448989  | 100   | HIV |
| >HIP632  | LEAAPMSIPPEVKFNKPFVF                 | 17448989  | 100   | HIV |
| >HIP642  | LEAIPCSIPPCVGFQKPFVF                 | 17448989  | 0.73  | HIV |
| >HIP643  | LEAIPCSIPPCVLFNKPFVF                 | 17448989  | 0.84  | HIV |
| >HIP649  | LEAIPMSIPA EVKFNKPFVF                | 17448989  | 9.72  | HIV |
| >HIP753  | LLKELWTKIKGAGKAVLGKIKGLL             | 20086159  | 1.4   | HIV |
| >HIP801  | WMEWDREINNYTSLIGSLIEESQNQQEKNEQELLE  | US6861059 | 0.002 | HIV |
| >HIP810  | EINNYTSLIHSLIEESQNQQEKNEQELLELDKWASL | US6861059 | 0.464 | HIV |
| >HIP811  | EQIWNNMTWMEWDREINNYTSLIHSLIEESQNQQEK | US6861059 | 0.033 | HIV |
| >HIP843  | TSLIHSLIEESQNQQEKNEQELLELDKWASLWNWFN | US6861059 | 0.006 | HIV |
| >HIP944  | GRKKRRQRRR                           | 22319541  | 50    | HIV |
| >HIP951  | PKSSWSDHEASSGV                       | 21198428  | 27    | HIV |

**Table S3.** List of 15 best performing physicochemical properties of AVPs using different a) Support Vector Machine, b) Random Forest, c) Instance Based Classifier and d) K-Star

a) List of 15 best performing physicochemical properties of AVPs using Support Vector Machine (SVM)

| Property   | Reference                                                                       |
|------------|---------------------------------------------------------------------------------|
| QIAN880113 | Weights for alpha-helix at the window position of 6 (Qian-Sejnowski, 1988)      |
| SUYM030101 | Linker propensity index (Suyama-Ohara, 2003)                                    |
| FINA910102 | Helix initiation parameter at position i,i+1,i+2 (Finkelstein et al., 1991)     |
| CHOP780211 | Normalized frequency of C-terminal non beta region (Chou-Fasman, 1978b)         |
| MUNV940105 | Free energy in beta-strand region (Munoz-Serrano, 1994)                         |
| TANS770102 | Normalized frequency of isolated helix (Tanaka-Scheraga, 1977)                  |
| MUNV940104 | Free energy in beta-strand region (Munoz-Serrano, 1994)                         |
| PALJ810114 | Normalized frequency of turn in all-beta class (Palau et al., 1981)             |
| PALJ810115 | Normalized frequency of turn in alpha+beta class (Palau et al., 1981)           |
| QIAN880110 | Weights for alpha-helix at the window position of 3 (Qian-Sejnowski, 1988)      |
| AURR980103 | Normalized positional residue frequency at helix termini N" (Aurora-Rose, 1988) |
| ISOY800104 | Normalized relative frequency of bend R (Isogai et al., 1980)                   |
| MUNV940102 | Free energy in alpha-helical region (Munoz-Serrano, 1994)                       |
| RACS820110 | Average relative fractional occurrence in EL(i-1) (Rackovsky-Scheraga, 1982)    |
| AURR980105 | Normalized positional residue frequency at helix termini Nc (Aurora-Rose, 1998) |

b) List of 15 best performing physicochemical properties of AVPs using Random Forest (RF)

| Property   | Reference                                                                  |
|------------|----------------------------------------------------------------------------|
| PALJ810113 | Normalized frequency of turn in all-alpha class (Palau et al, 1981)        |
| COSI940101 | Electron-ion interaction potential values (Cosic: 1994)                    |
| VELV850101 | Electron-ion interaction potential (Veljkovic et al, 1985)                 |
| GRAR740101 | Composition (Grantham: 1974)                                               |
| RACS820103 | Average relative fractional occurrence in AL(i) (Rackovsky-Scheraga: 1982) |
| YUTK870101 | Unfolding Gibbs energy in water: pH7.0 (Yutani et al, 1987)                |
| YUTK870103 | Activation Gibbs energy of unfolding: pH7.0 (Yutani et al, 1987)           |
| OLSK800101 | Average internal preferences (Olsen: 1980)                                 |
| YUTK870102 | Unfolding Gibbs energy in water: pH9.0 (Yutani et al, 1987)                |
| QIAN880129 | Weights for coil at the window position of -4 (Qian-Sejnowski: 1988)       |
| YUTK870104 | Activation Gibbs energy of unfolding: pH9.0 (Yutani et al, 1987)           |
| GUOD860101 | Retention coefficient at pH 2 (Guo et al, 1986)                            |
| BLAS910101 | Scaled side chain hydrophobicity values (Black-Mould: 1991)                |
| JOND750101 | Hydrophobicity (Jones: 1975)                                               |
| ARGP820101 | Hydrophobicity index (Argos et al, 1982)                                   |

c) List of 15 best performing physicochemical properties of AVPs using Instance Based Classifier (IBk)

| Property   | Reference                                                                    |
|------------|------------------------------------------------------------------------------|
| FINA770101 | Helix-coil equilibrium constant (Finkelstein-Ptitsyn, 1977)                  |
| FINA910101 | Helix initiation parameter at position i-1 (Finkelstein et al., 1991)        |
| GEIM800101 | Alpha-helix indices (Geisow-Roberts, 1980)                                   |
| GEIM800102 | Alpha-helix indices for alpha-proteins (Geisow-Roberts, 1980)                |
| GEIM800104 | Alpha-helix indices for alpha/beta-proteins (Geisow-Roberts, 1980)           |
| GEIM800109 | Aperiodic indices for alpha-proteins (Geisow-Roberts: 1980)                  |
| RACS820110 | Average relative fractional occurrence in EL(i-1) (Rackovsky-Scheraga, 1982) |
| QIAN880113 | Weights for alpha-helix at the window position of 6 (Qian-Sejnowski, 1988)   |
| YUTK870101 | Unfolding Gibbs energy in water: pH7.0 (Yutani et al, 1987)                  |
| QIAN880126 | Weights for beta-sheet at the window position of 6 (Qian-Sejnowski: 1988)    |
| QIAN880132 | Weights for coil at the window position of -1 (Qian-Sejnowski: 1988)         |
| RICJ880107 | Relative preference value at N4 (Richardson-Richardson: 1988)                |
| ROBB760109 | Information measure for N-terminal turn (Robson-Suzuki: 1976)                |
| SUYM030101 | Linker propensity index (Suyama-Ohara: 2003)                                 |
| ZIMJ680101 | Hydrophobicity (Zimmerman et al, 1968)                                       |

d) List of 15 best performing physicochemical properties of AVPs using K-Star (K\*)

| Property   | Reference                                                                       |
|------------|---------------------------------------------------------------------------------|
| YUTK870104 | Activation Gibbs energy of unfolding: pH9.0 (Yutani et al, 1987)                |
| SUYM030101 | Linker propensity index (Suyama-Ohara, 2003)                                    |
| RACS820110 | Average relative fractional occurrence in EL(i-1) (Rackovsky-Scheraga, 1982)    |
| QIAN880129 | Weights for coil at the window position of -4 (Qian-Sejnowski: 1988)            |
| QIAN880108 | Weights for alpha-helix at the window position of 1 (Qian-Sejnowski: 1988)      |
| MUNV940102 | Free energy in alpha-helical region (Munoz-Serrano, 1994)                       |
| ISOY800104 | Normalized relative frequency of bend R (Isogai et al., 1980)                   |
| GEIM800101 | Alpha-helix indices (Geisow-Roberts, 1980)                                      |
| FINA910101 | Helix initiation parameter at position i-1 (Finkelstein et al., 1991)           |
| MUNV940105 | Free energy in beta-strand region (Munoz-Serrano, 1994)                         |
| FINA770101 | Helix-coil equilibrium constant (Finkelstein-Ptitsyn, 1977)                     |
| GEIM800102 | Alpha-helix indices for alpha-proteins (Geisow-Roberts, 1980)                   |
| BULH740102 | Apparent partial specific volume (Bull-Breese, 1974)                            |
| AURR980105 | Normalized positional residue frequency at helix termini Nc (Aurora-Rose, 1998) |
| CASG920101 | Hydrophobicity scale from native protein structures (Casari-Sippl, 1992)        |

**Table S4.** SVM and RF parameters used to develop prediction models.

| S. No. | Feature                              | No. of features | Machine learning technique |               |            |      |             |
|--------|--------------------------------------|-----------------|----------------------------|---------------|------------|------|-------------|
|        |                                      |                 | SVM                        | Parameters    |            | RF   | Parameters  |
|        |                                      |                 | PCC                        | <i>g</i>      | <i>c</i>   | PCC  | <i>mtry</i> |
| 1      | Amino acid composition (Mono)        | 20              | 0.59                       | <i>0.001</i>  | <i>20</i>  | 0.64 | <i>20</i>   |
| 2      | Di-peptide composition (Di)          | 400             | 0.61                       | <i>0.0003</i> | <i>30</i>  | 0.62 | <i>144</i>  |
| 3      | C8 Binary profile (C8 Bin)           | 160             | 0.56                       | <i>0.1</i>    | <i>10</i>  | 0.60 | <i>14</i>   |
| 4      | N8 Binary profile (N8 Bin)           | 160             | 0.51                       | <i>0.5</i>    | <i>70</i>  | 0.60 | <i>16</i>   |
| 5      | Physicochemical properties (Physico) | 315             | 0.59                       | <i>0.001</i>  | <i>50</i>  | 0.68 | <i>209</i>  |
| 6      | Solvent accessibility (SA)           | 21              | 0.22                       | <i>0.06</i>   | <i>10</i>  | 0.18 | <i>6</i>    |
| 7      | Secondary structure (SS)             | 3               | 0.18                       | <i>5</i>      | <i>5</i>   | 0.16 | <i>1</i>    |
| 8      | <b>1+2</b>                           | 420             | 0.60                       | <i>0.001</i>  | <i>60</i>  | 0.62 | <i>210</i>  |
| 9      | <b>3+4</b>                           | 320             | 0.59                       | <i>0.1</i>    | <i>150</i> | 0.65 | <i>22</i>   |
| 10     | <b>1+2+5</b>                         | 735             | 0.63                       | <i>0.001</i>  | <i>10</i>  | 0.64 | <i>212</i>  |
| 11     | <b>3+4+5</b>                         | 635             | 0.63                       | <i>0.001</i>  | <i>50</i>  | 0.67 | <i>208</i>  |
| 12     | <b>1+2+3+4</b>                       | 740             | 0.61                       | <i>0.0001</i> | <i>500</i> | 0.63 | <i>400</i>  |



|                                                                                                           |                  |            |             |               |            |             |            |
|-----------------------------------------------------------------------------------------------------------|------------------|------------|-------------|---------------|------------|-------------|------------|
| <b>13</b>                                                                                                 | <b>1+2+3+4+5</b> | 1055       | 0.62        | <i>0.0003</i> | <i>100</i> | 0.64        | <i>430</i> |
| <b>14</b>                                                                                                 | <b>6+7</b>       | 23         | 0.22        | <i>0.3</i>    | <i>1</i>   | 0.19        | <i>6</i>   |
| <b>15</b>                                                                                                 | <b>1+2+5+6+7</b> | <b>758</b> | <b>0.66</b> | <i>0.005</i>  | <i>100</i> | <b>0.68</b> | <i>240</i> |
| <b>16</b>                                                                                                 | <b>3+4+5+6+7</b> | <b>658</b> | <b>0.65</b> | <i>0.001</i>  | <i>200</i> | <b>0.70</b> | <i>280</i> |
| <b>Abbreviations</b> SVM: Support vector machine, RF: Random forest, PCC :Pearson Correlation Coefficient |                  |            |             |               |            |             |            |

**Table S5.** Performance of SVM models based on training and validation data composed on randomized instances.

| S. No.                                                                                                                                                         | Feature                           | No. of features | PCC obtained using SVM |      |           |      |           |      |
|----------------------------------------------------------------------------------------------------------------------------------------------------------------|-----------------------------------|-----------------|------------------------|------|-----------|------|-----------|------|
|                                                                                                                                                                |                                   |                 | Dataset 1              |      | Dataset 2 |      | Dataset 3 |      |
|                                                                                                                                                                |                                   |                 | Train                  | Val  | Train     | Val  | Train     | Val  |
| 1                                                                                                                                                              | Mono aa composition               | 735             | 0.59                   | 0.64 | 0.60      | 0.58 | 0.59      | 0.53 |
| 2                                                                                                                                                              | Di aa composition                 | 635             | 0.61                   | 0.62 | 0.57      | 0.55 | 0.60      | 0.58 |
| 3                                                                                                                                                              | Mono + Di + C8 Bin + N8 Bin       | 740             | 0.61                   | 0.63 | 0.58      | 0.53 | 0.61      | 0.56 |
| 4.                                                                                                                                                             | Binary(N8/C8) + Physico + SS + SA | 658             | 0.65                   | 0.70 | 0.63      | 0.66 | 0.61      | 0.68 |
| <b>Abbreviations</b> SVM: Support vector machine, RF: Random forest, PCC :Pearson Correlation Coefficient , SA: Solvent accessibility, SS :Secondary structure |                                   |                 |                        |      |           |      |           |      |
